# Supplementary material for: PEGylated Dmoc phosphoramidites for sensitive oligodeoxynucleotide synthesis
Source: Royal Society of Chemistry journal article supplement (doi:10.1039/d3ob01495a), 2023-01-01

*ESI for*

## **PEGylated Dmoc Phosphoramidites for Sensitive Oligodeoxynucleotide Synthesis**

Komal Chillar, Yipeng Yin, Alexander Apostle and Shiyue Fang\*

Department of Chemistry and Health Research Institute, Michigan Technological University,  
1400 Townsend Drive, Houghton, MI, 49931, USA

Email: shifang@mtu.edu

**HPLC, MALDI-TOF MS, OD<sub>260</sub>, Capillary Electrophoresis, and Trityl Log  
for Oligodeoxynucleotides**

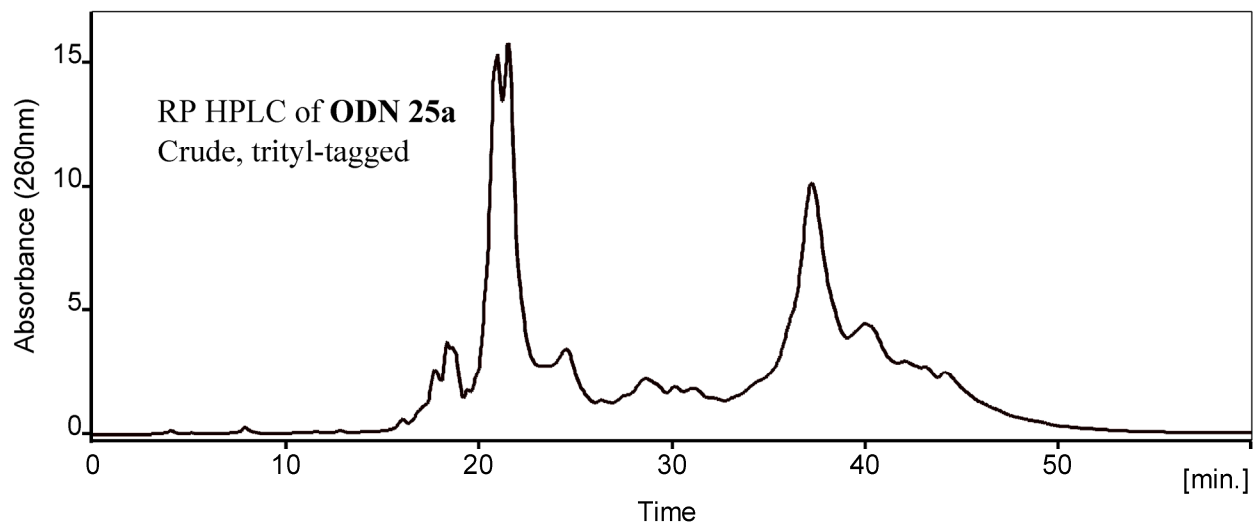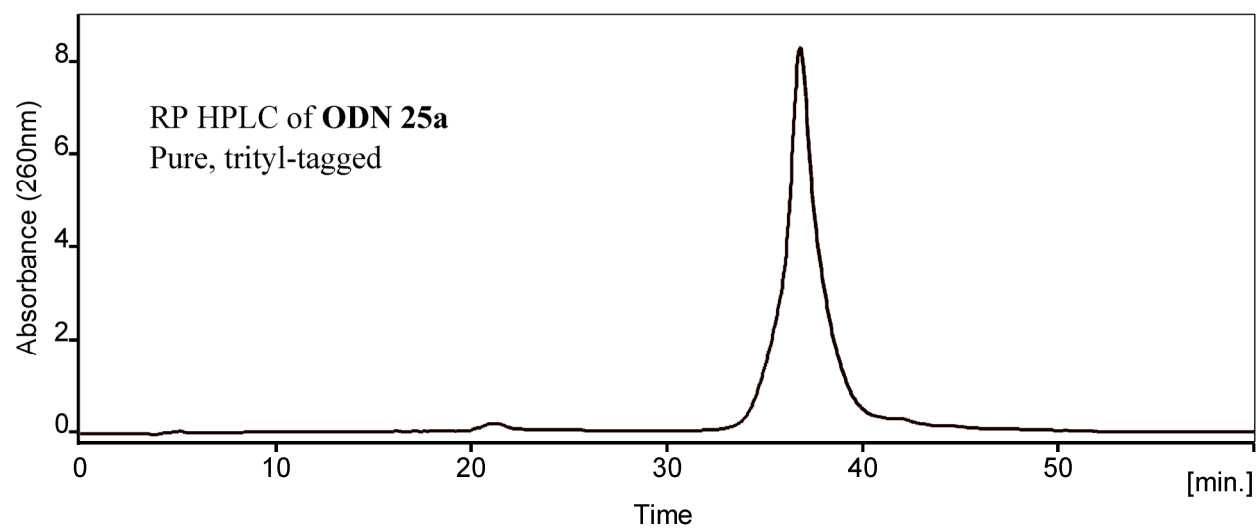

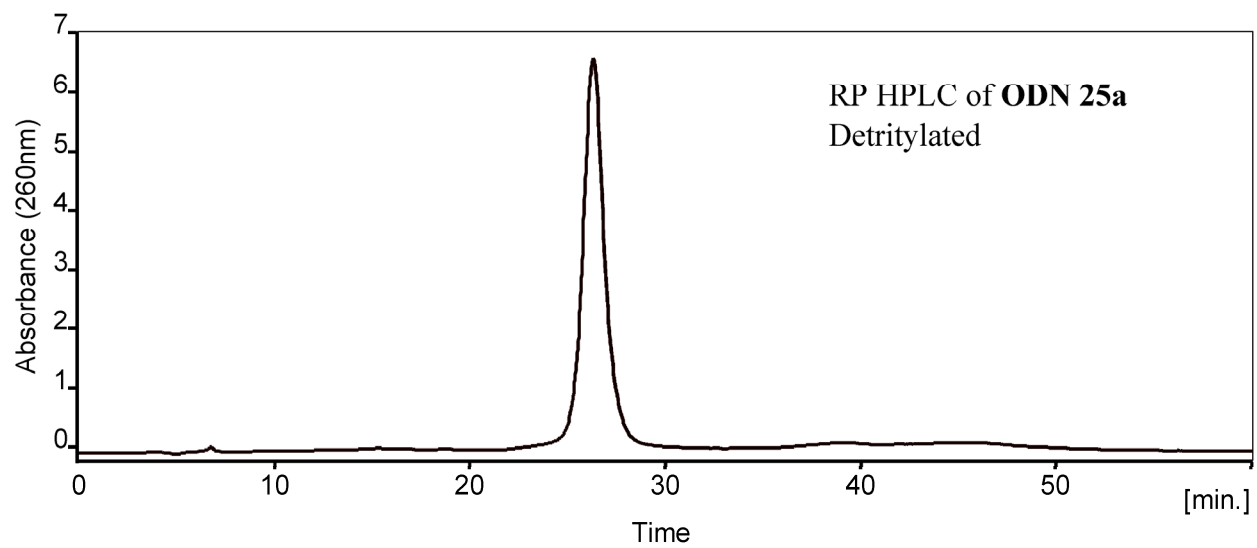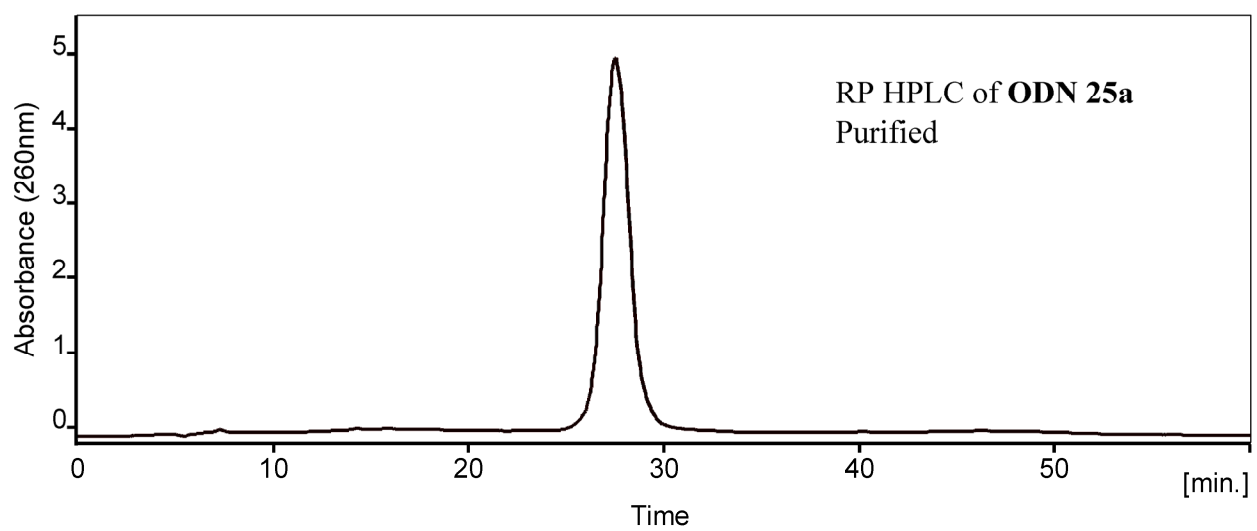

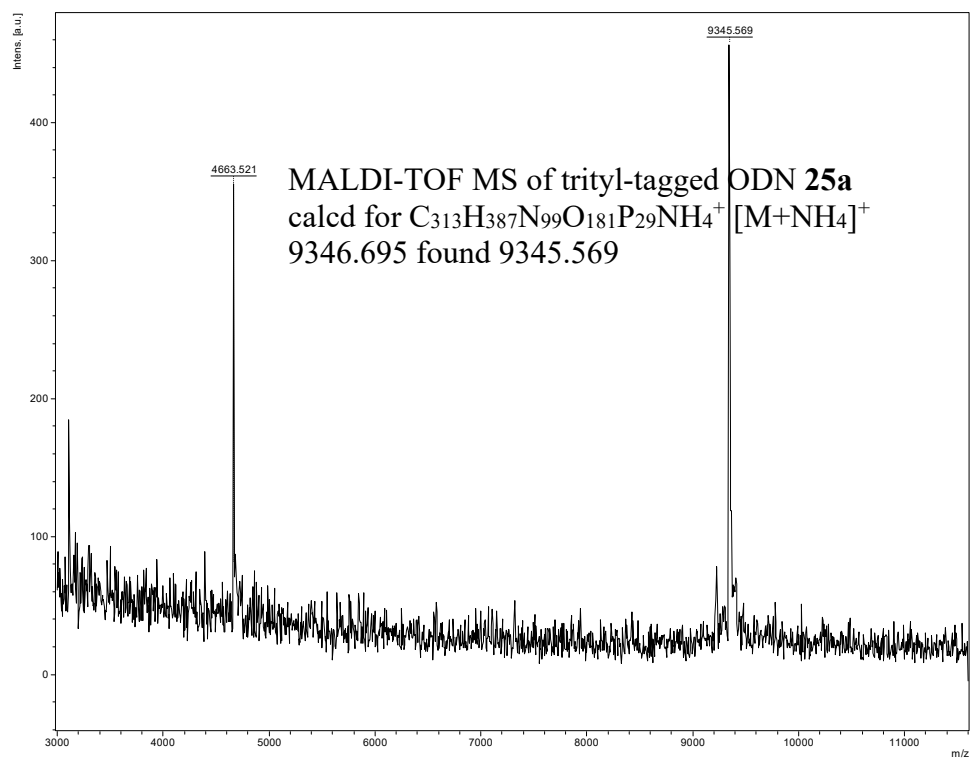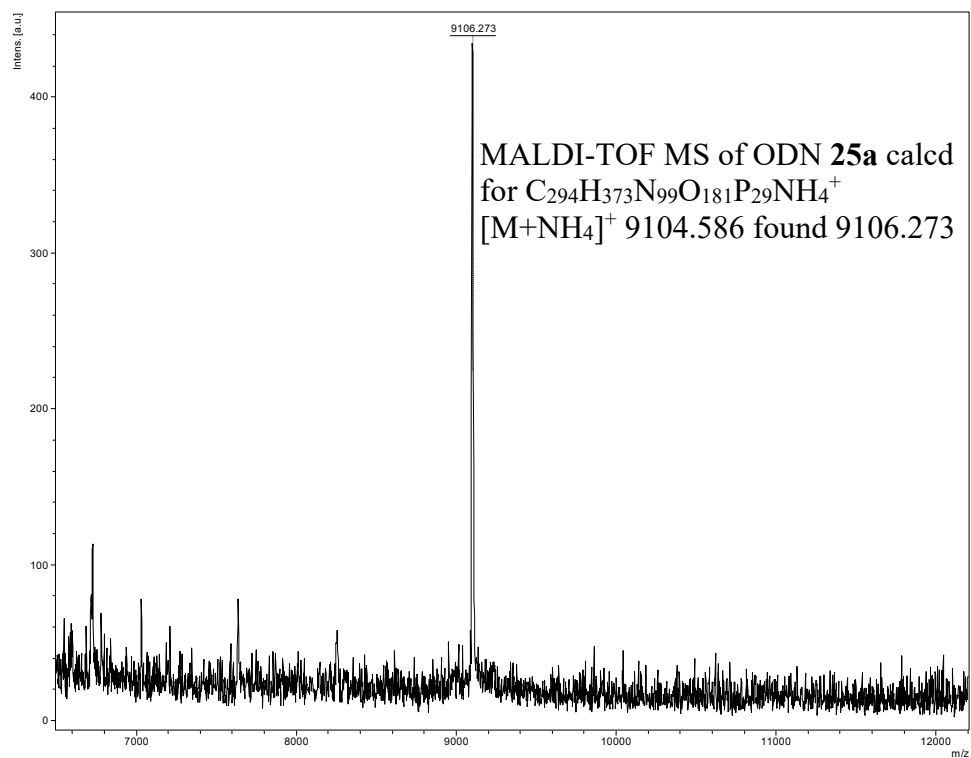

OD<sub>260</sub> of the ODN **25a** (30-mer) obtained from the 0.52  $\mu$ mol synthesis is 2.17.

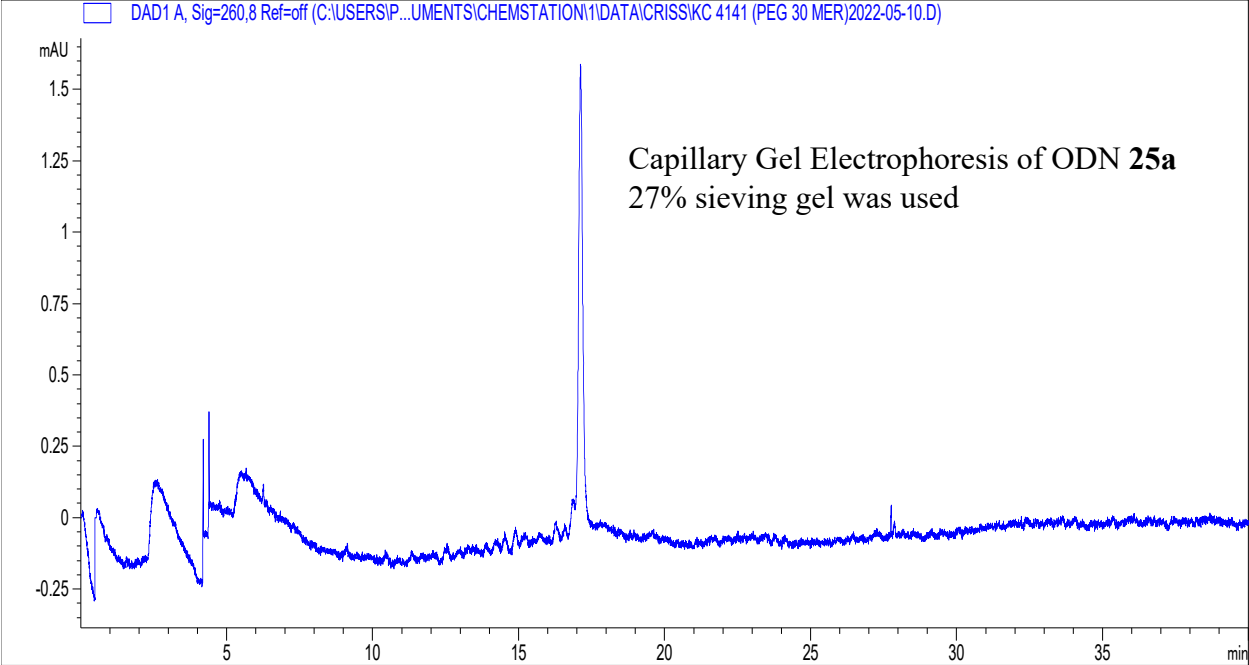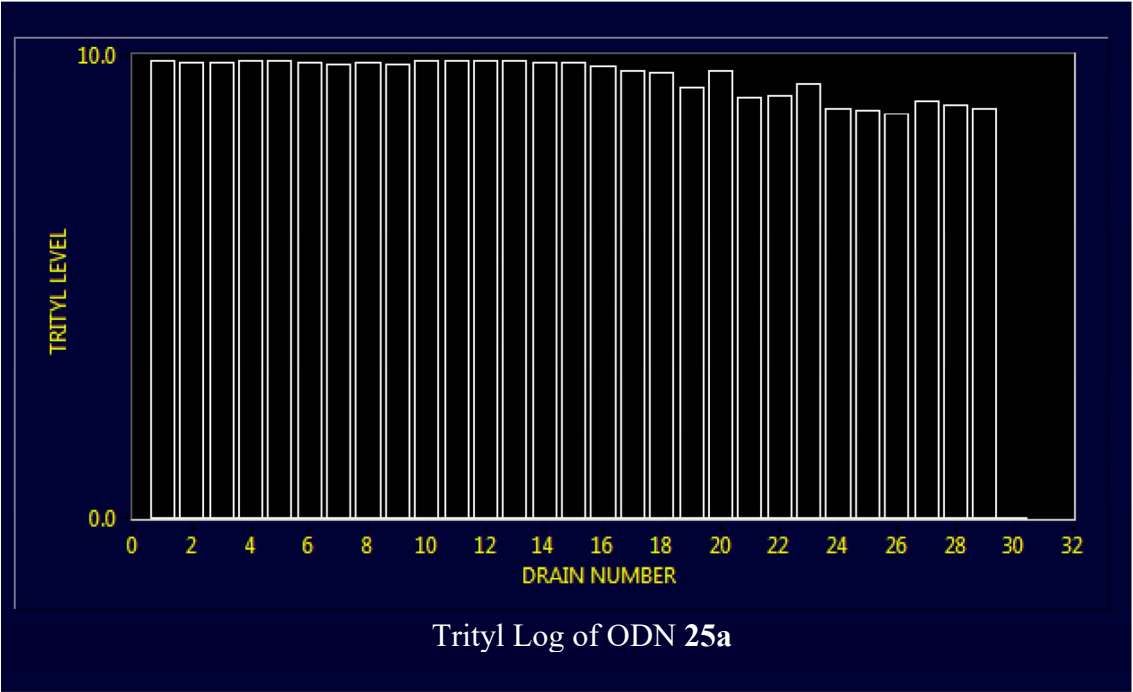

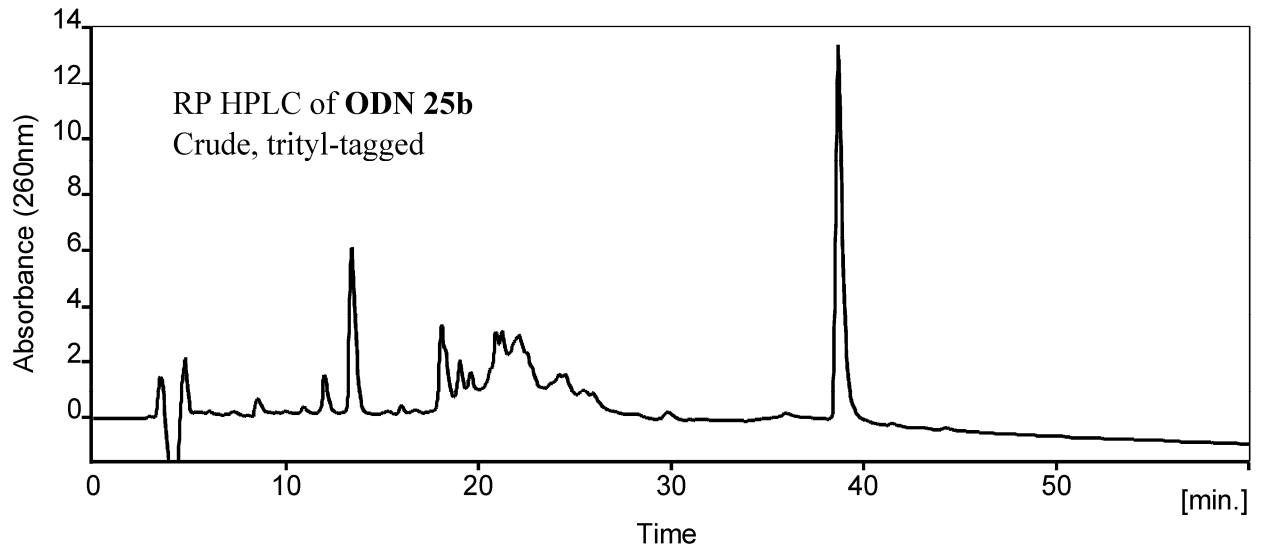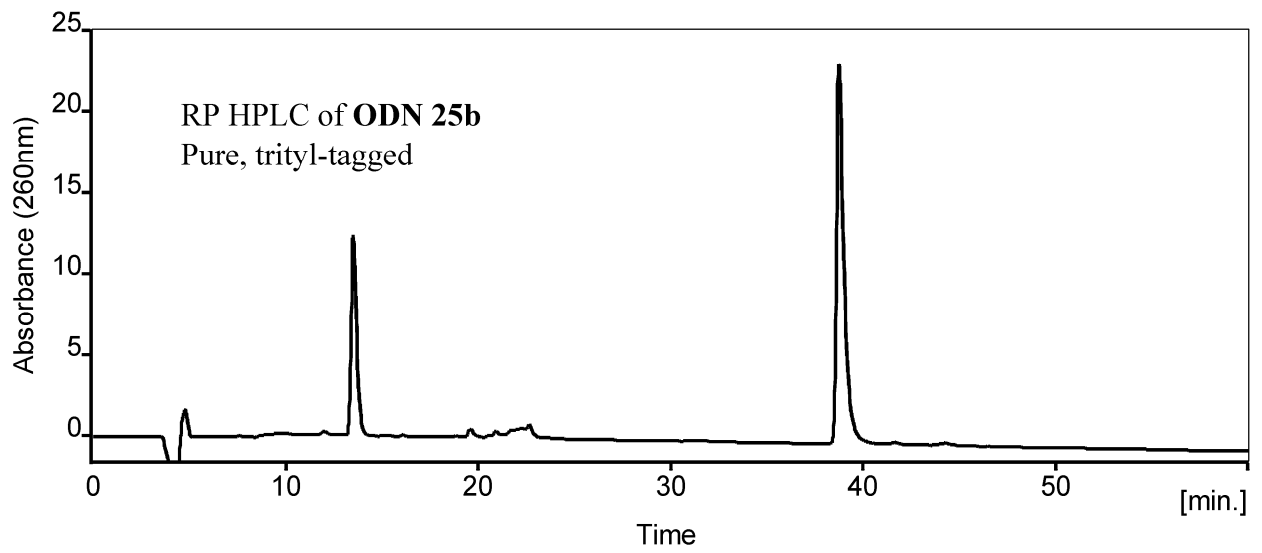

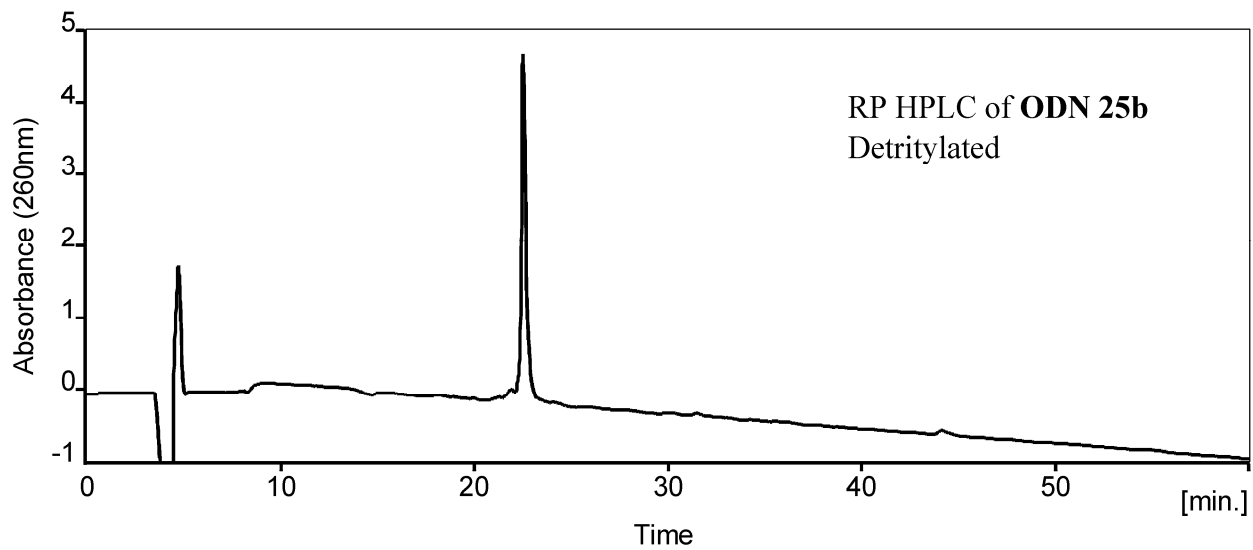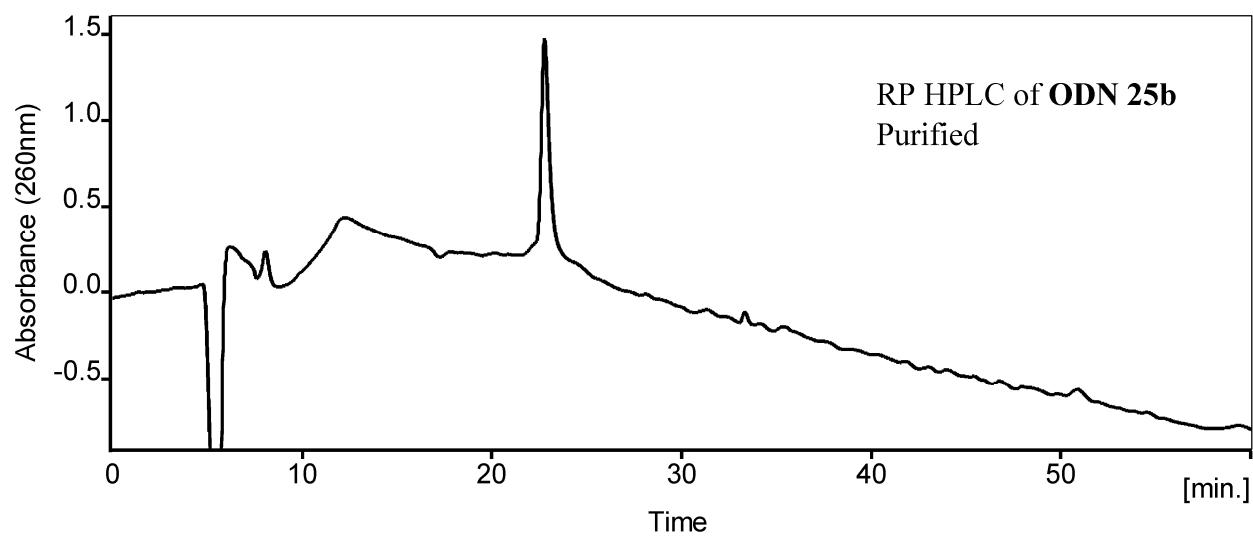

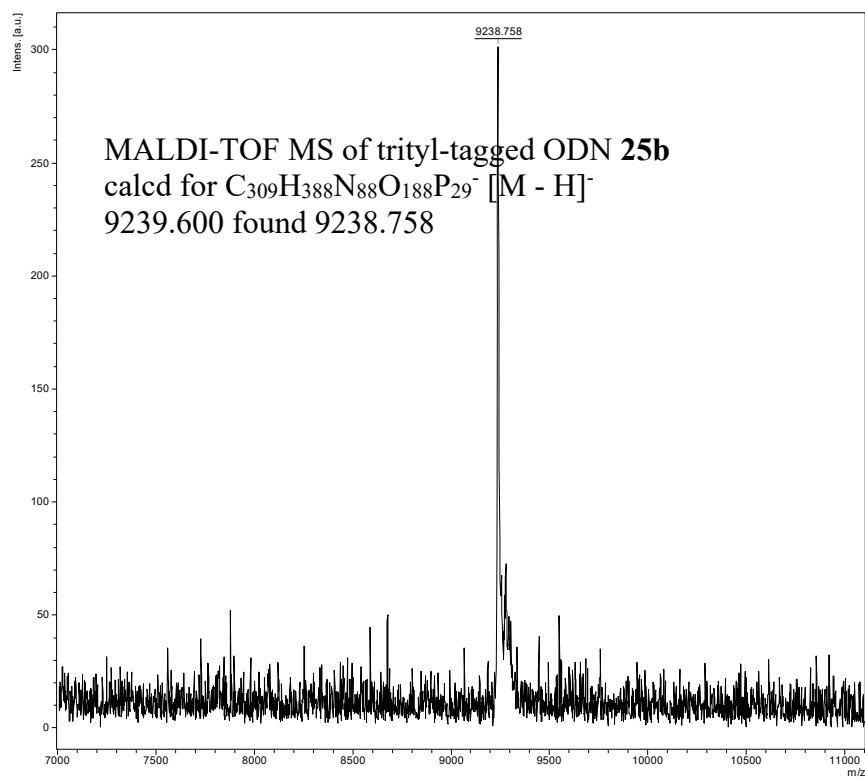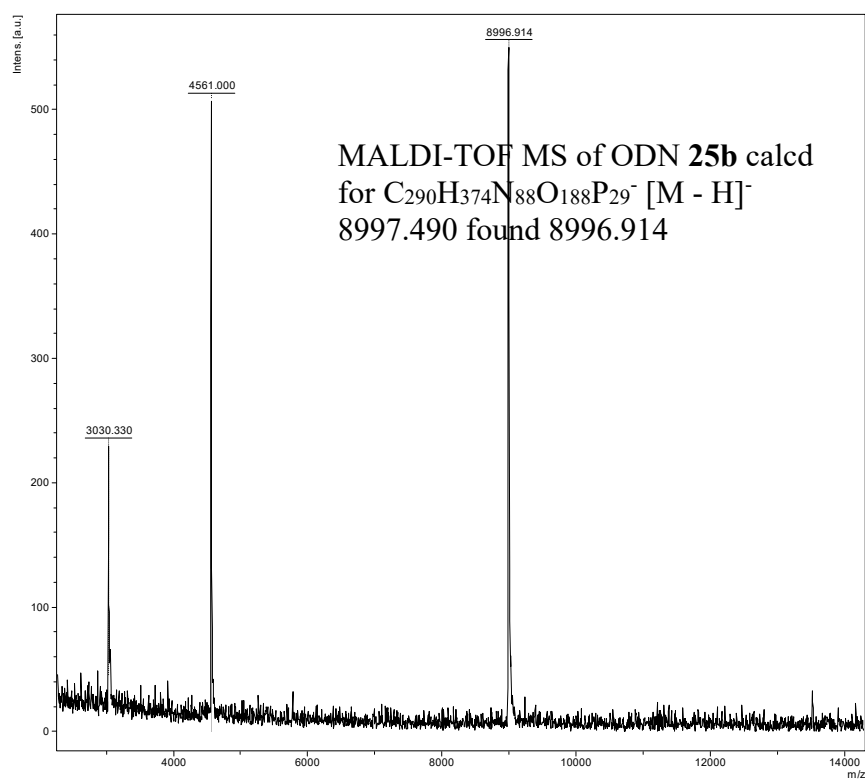

OD<sub>260</sub> of the ODN **25b** (30-mer) obtained from the 0.52  $\mu\text{mol}$  synthesis is 0.196.



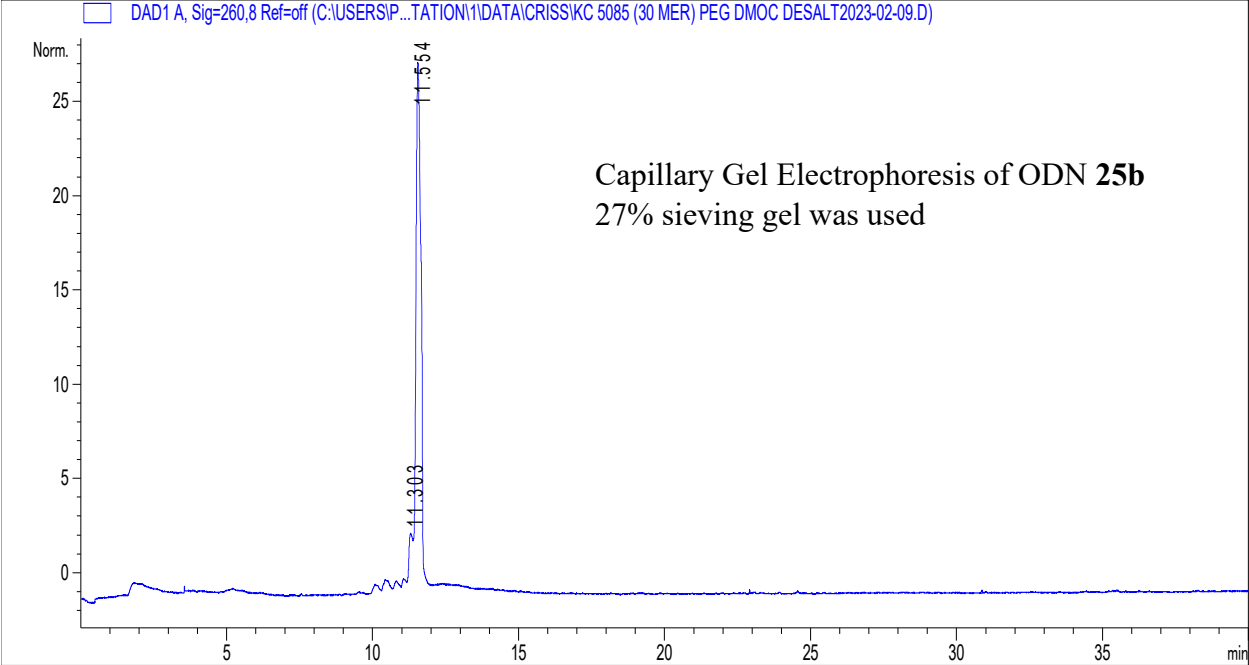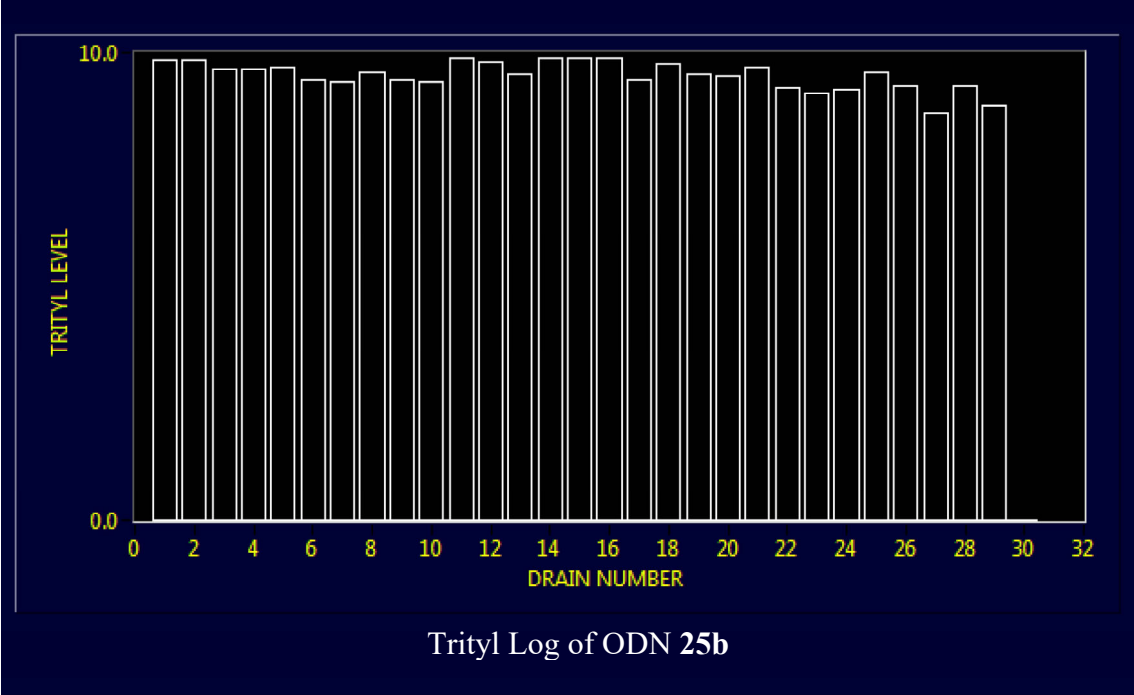

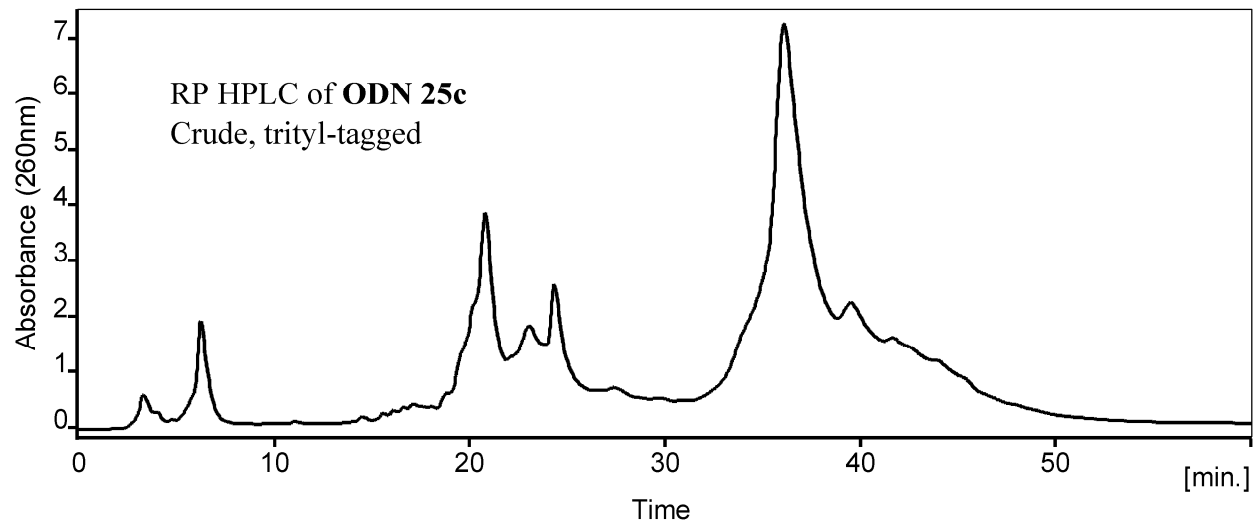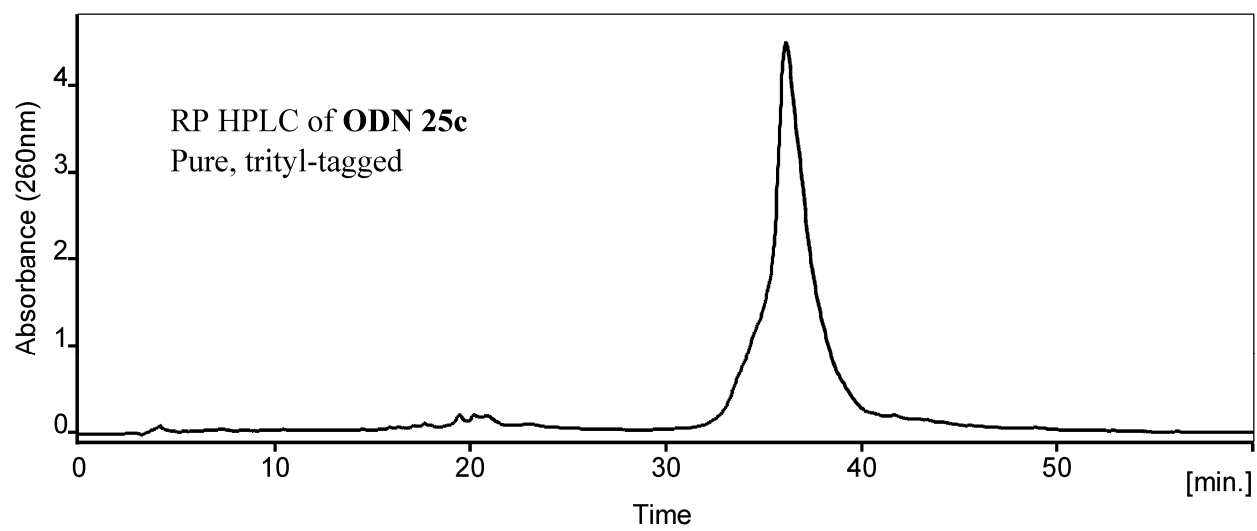

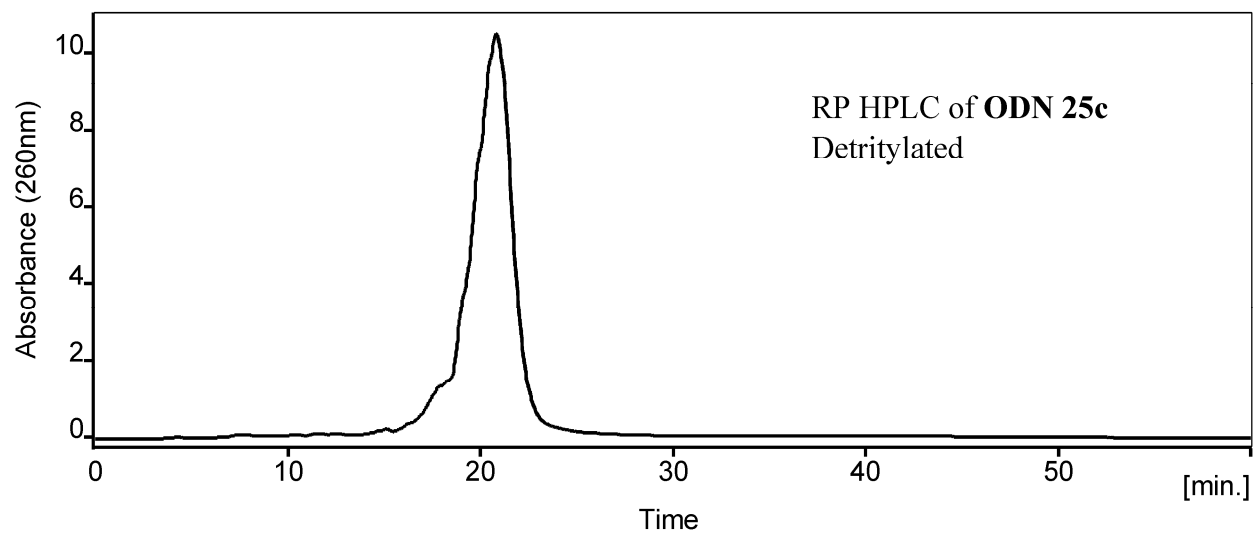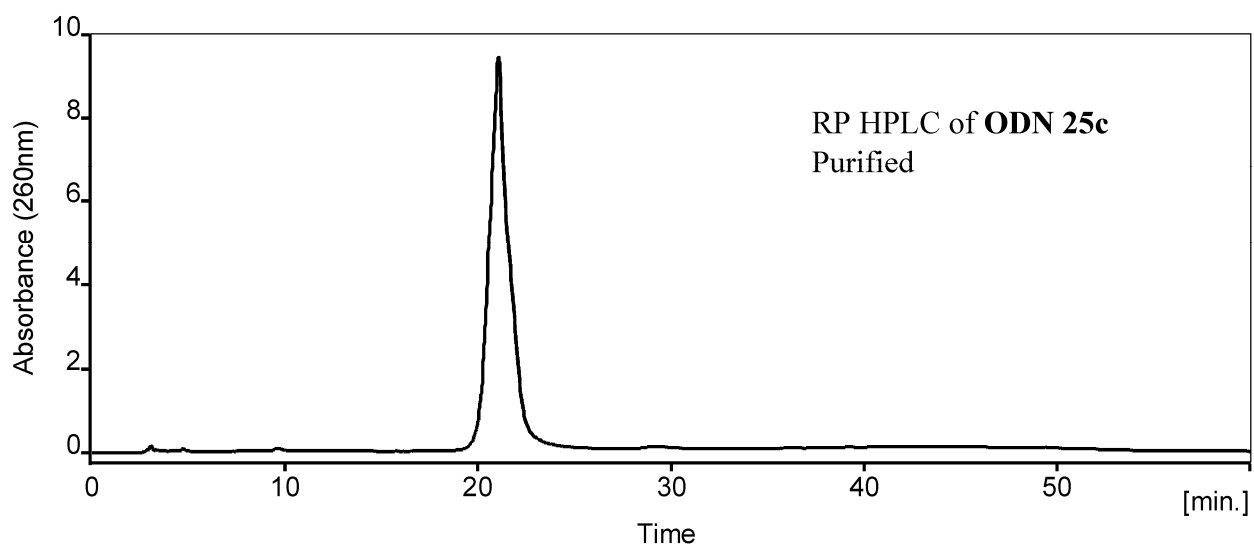

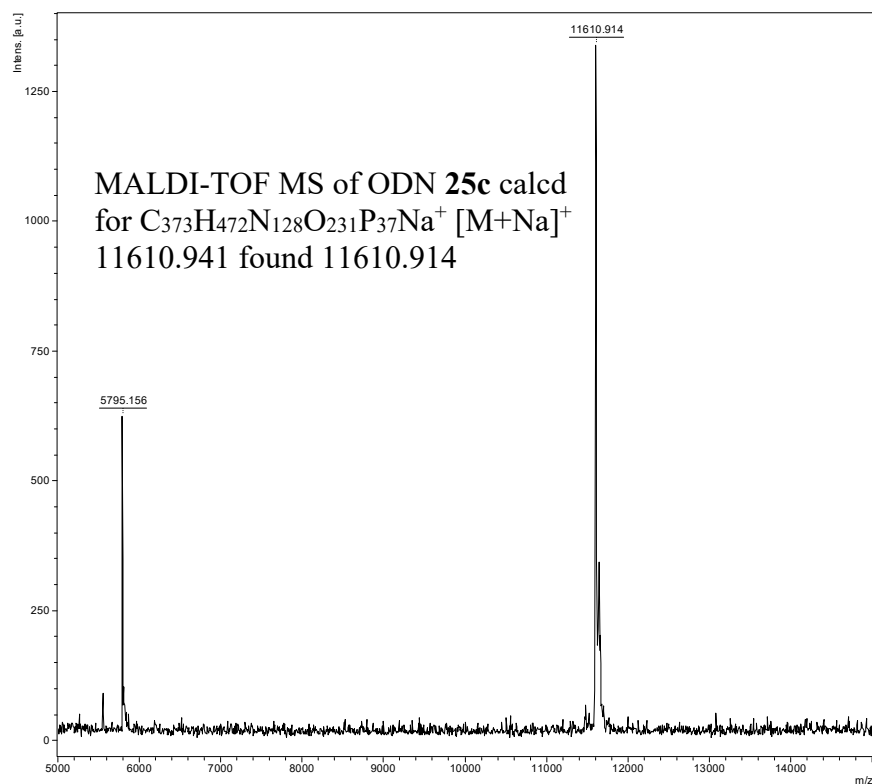

OD<sub>260</sub> of the ODN **25c** (38-mer) obtained from the 0.52 μmol synthesis is 3.15.

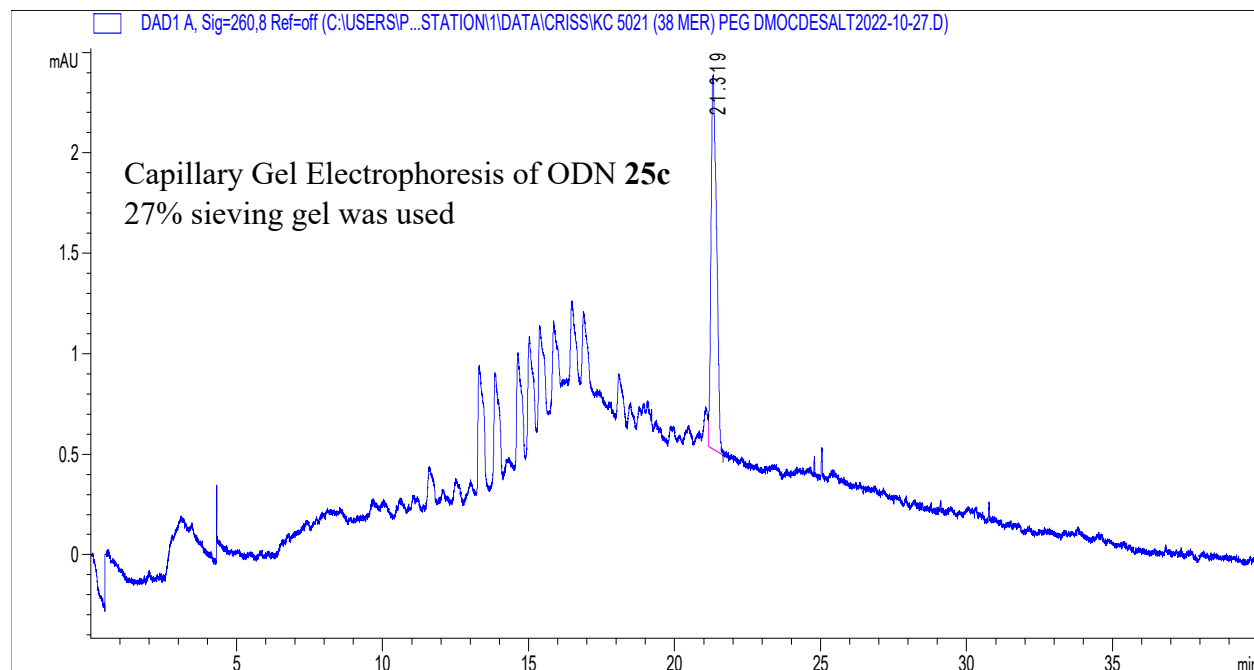

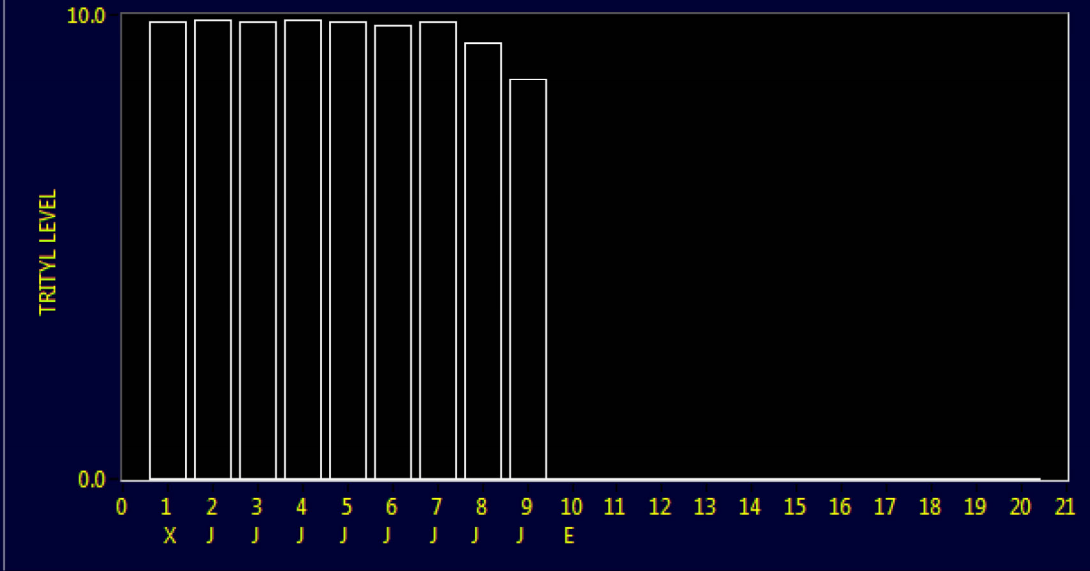

Trityl Log of ODN 25c (ODN 25a extended to ODN25c)

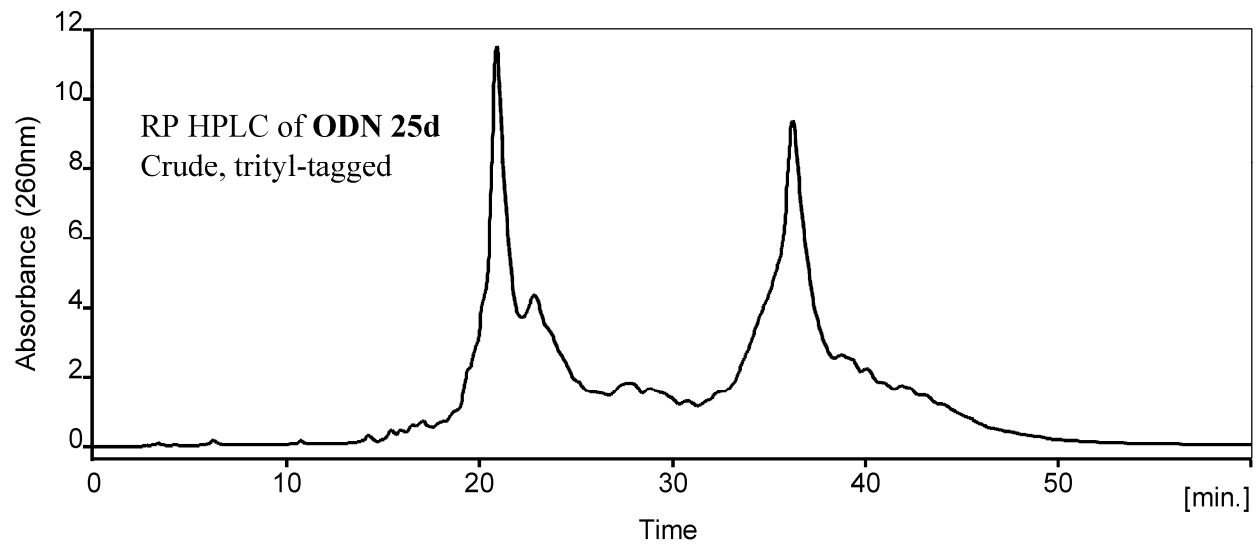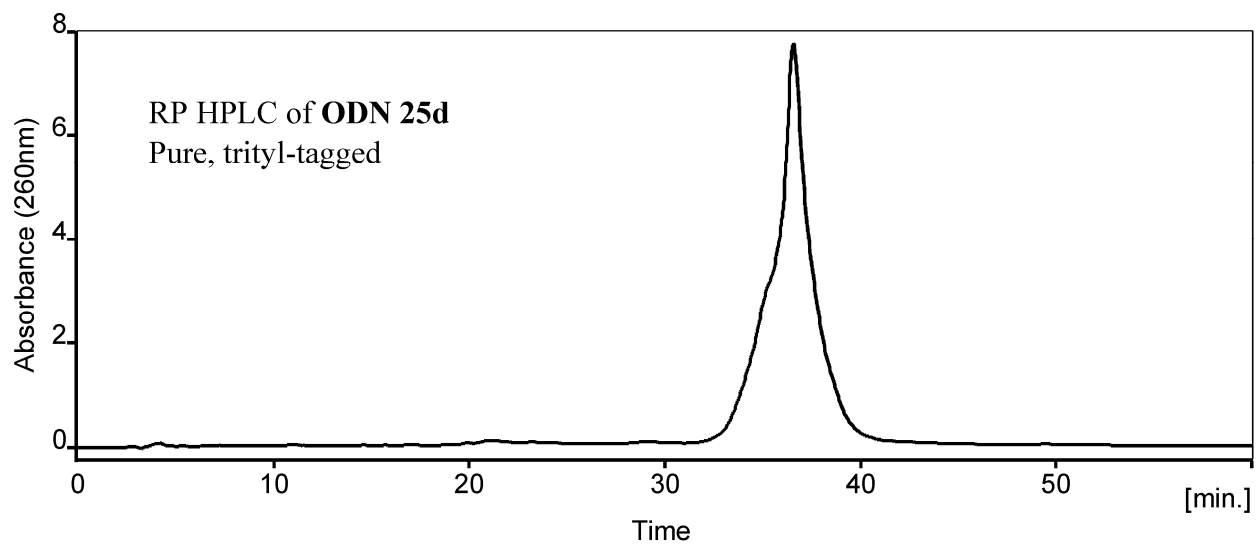

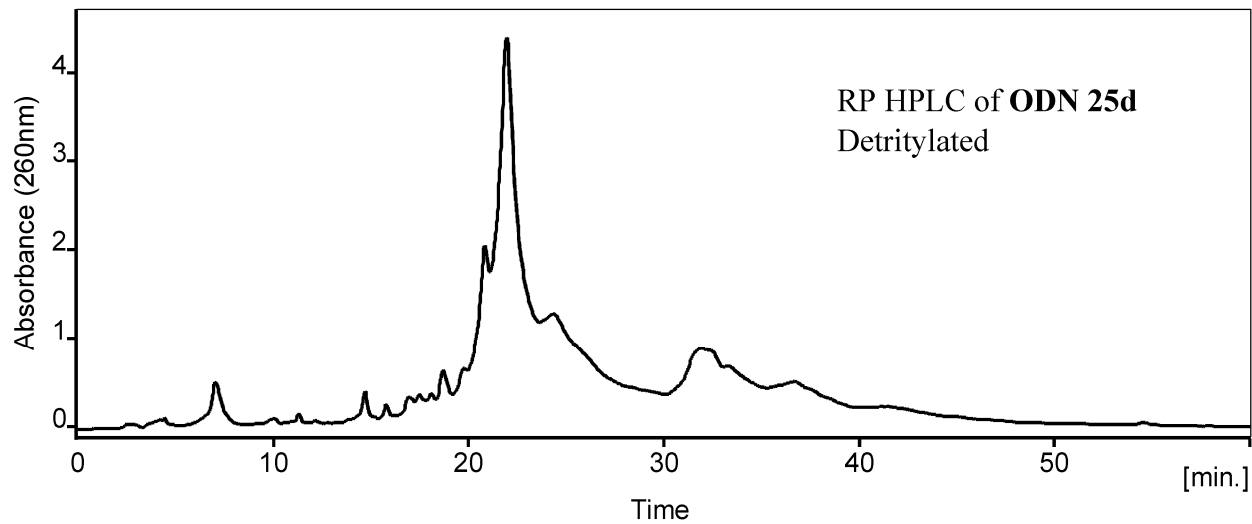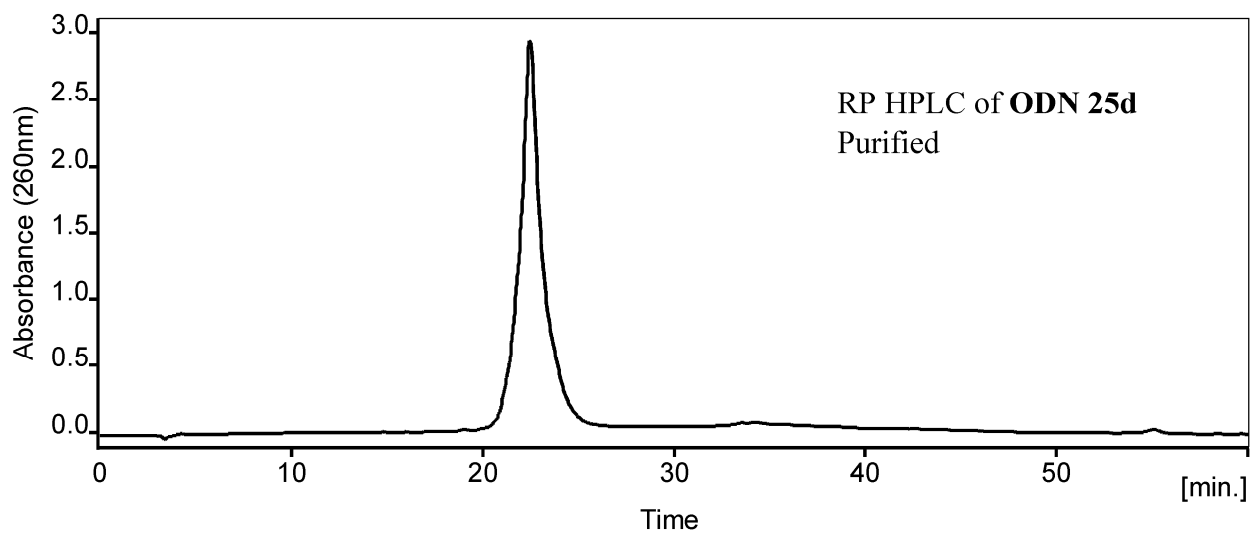

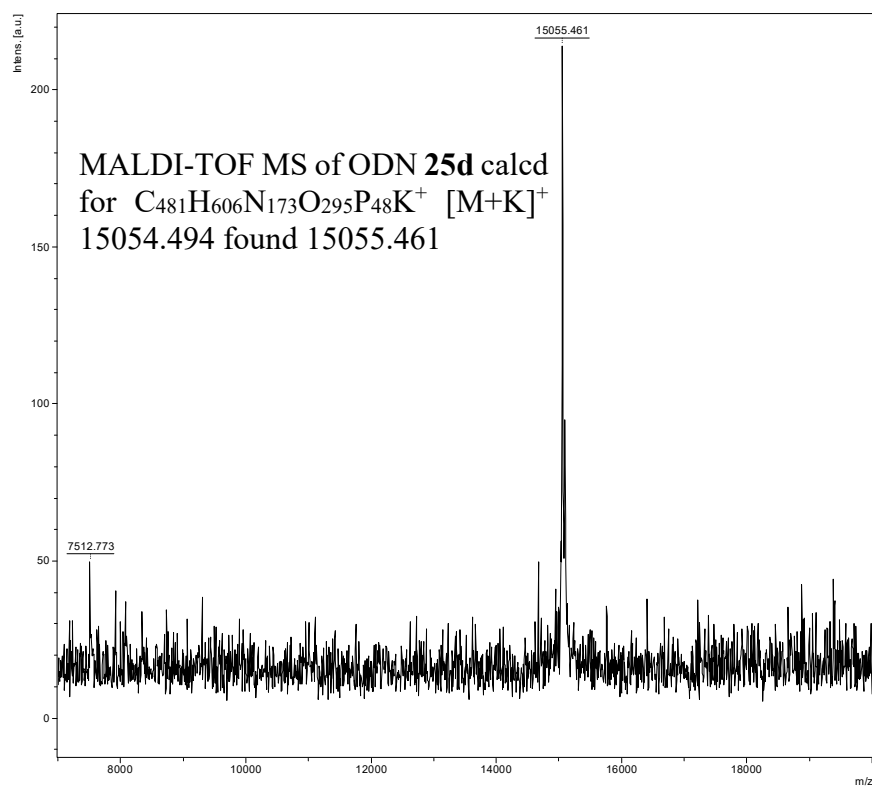

OD<sub>260</sub> of the ODN **25d** (49-mer) obtained from the 0.52  $\mu$ mol synthesis is 1.10.

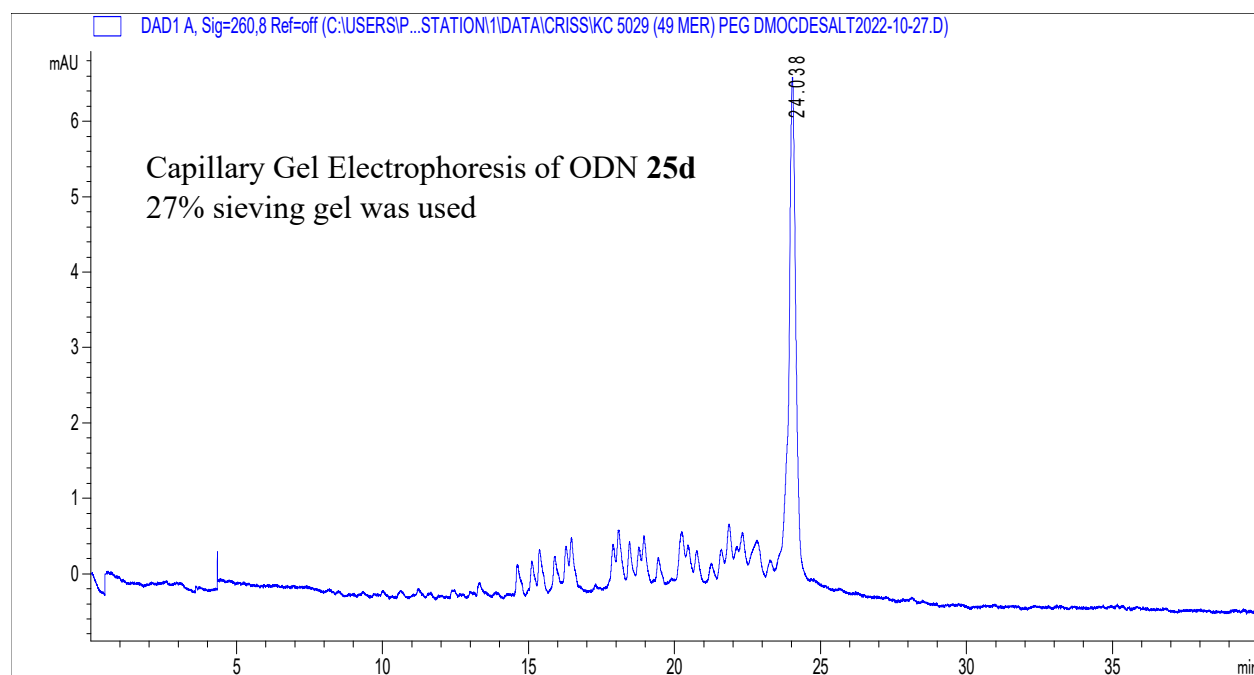



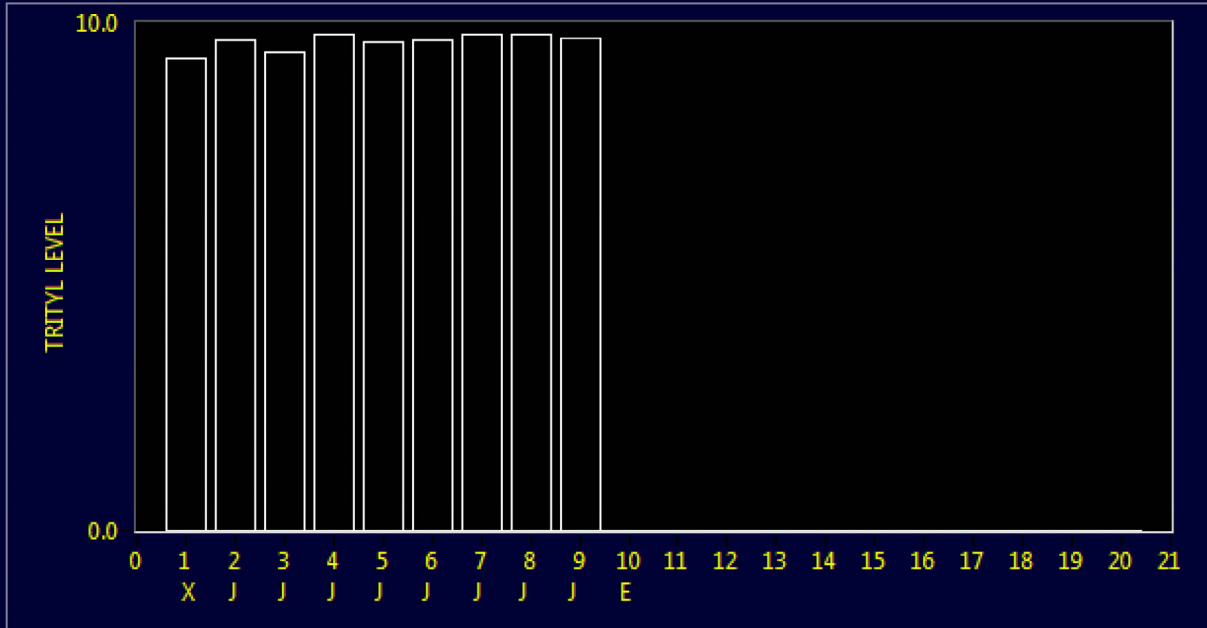

Trityl Log of ODN 25d (ODN 25c extended to ODN 25d)

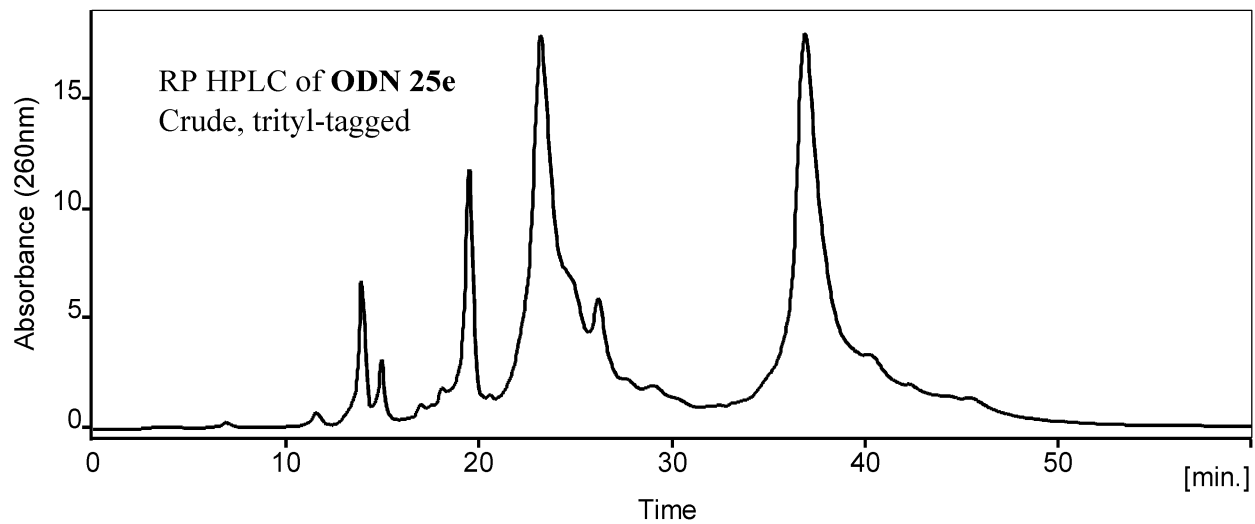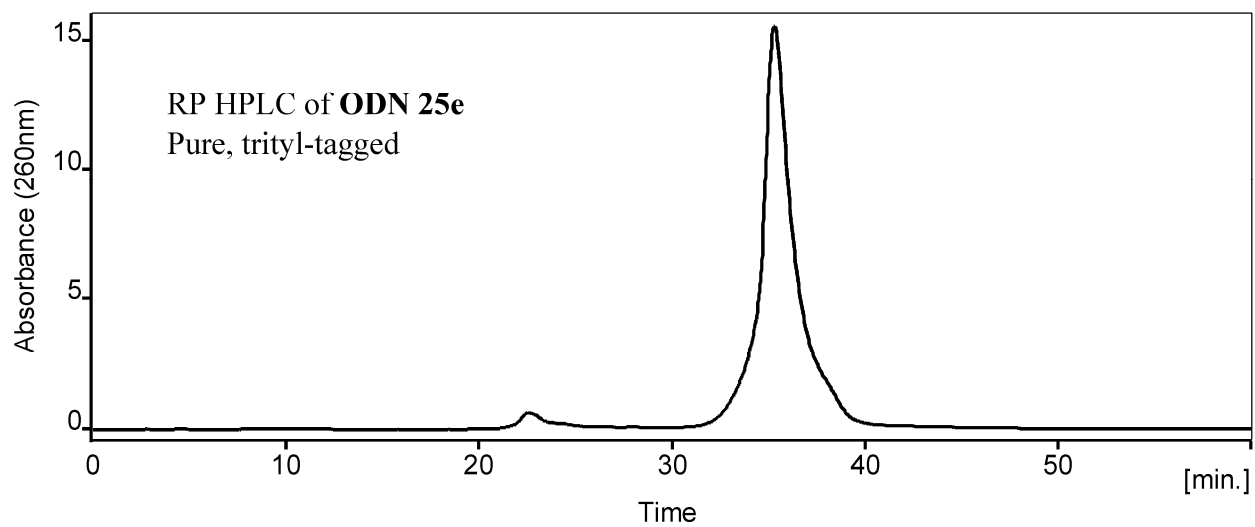

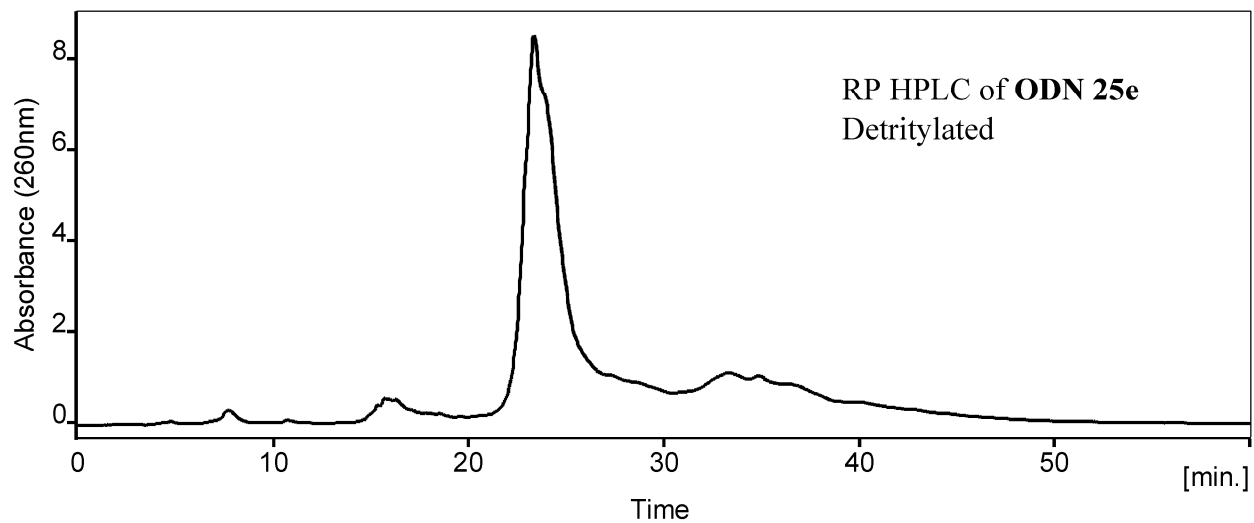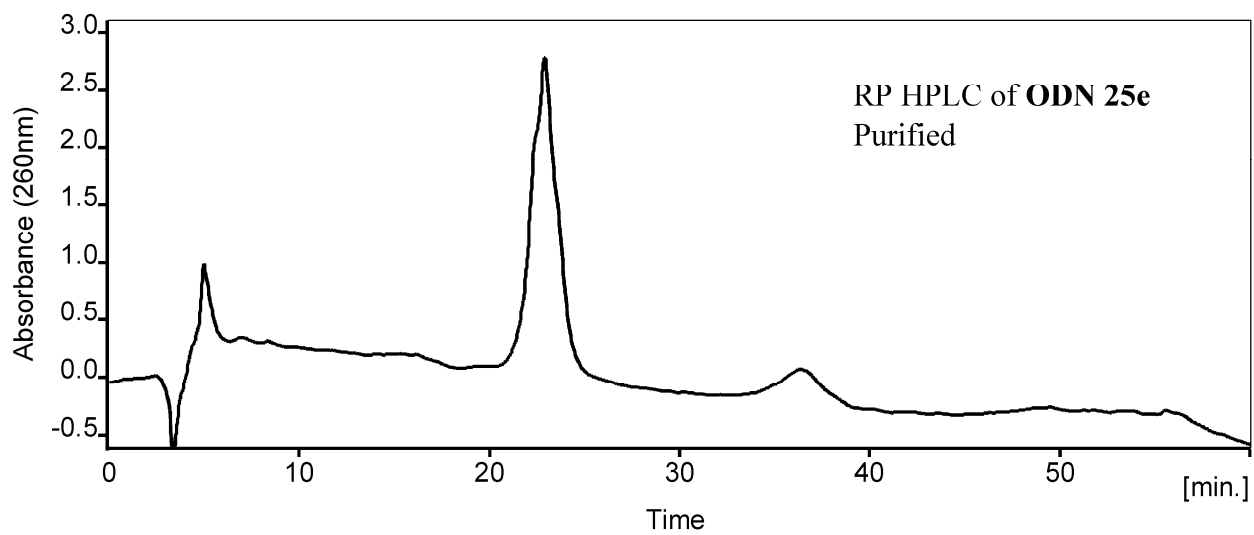

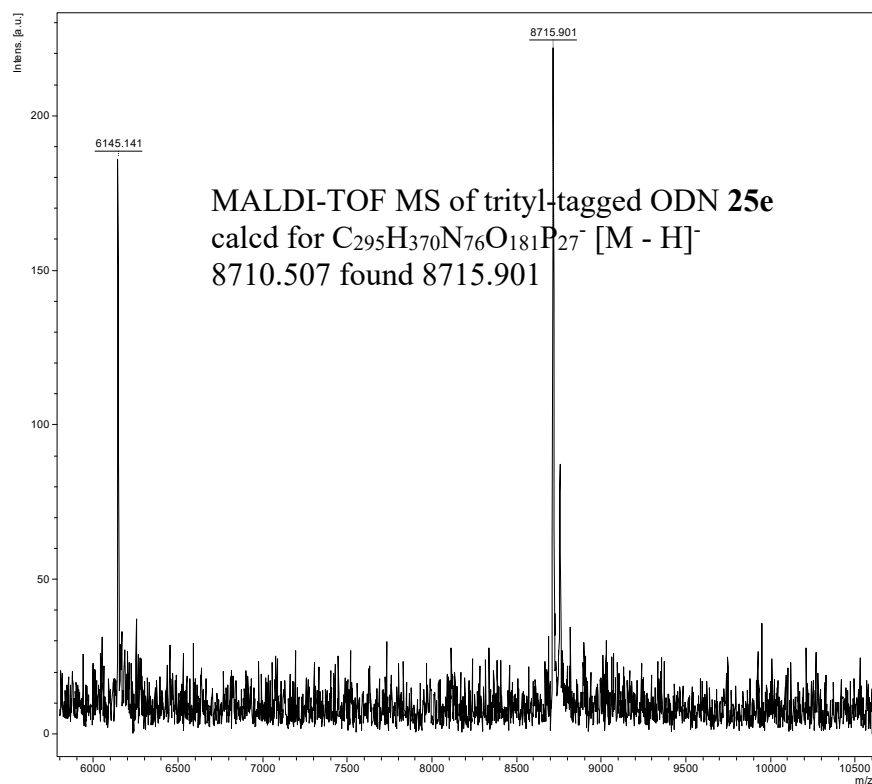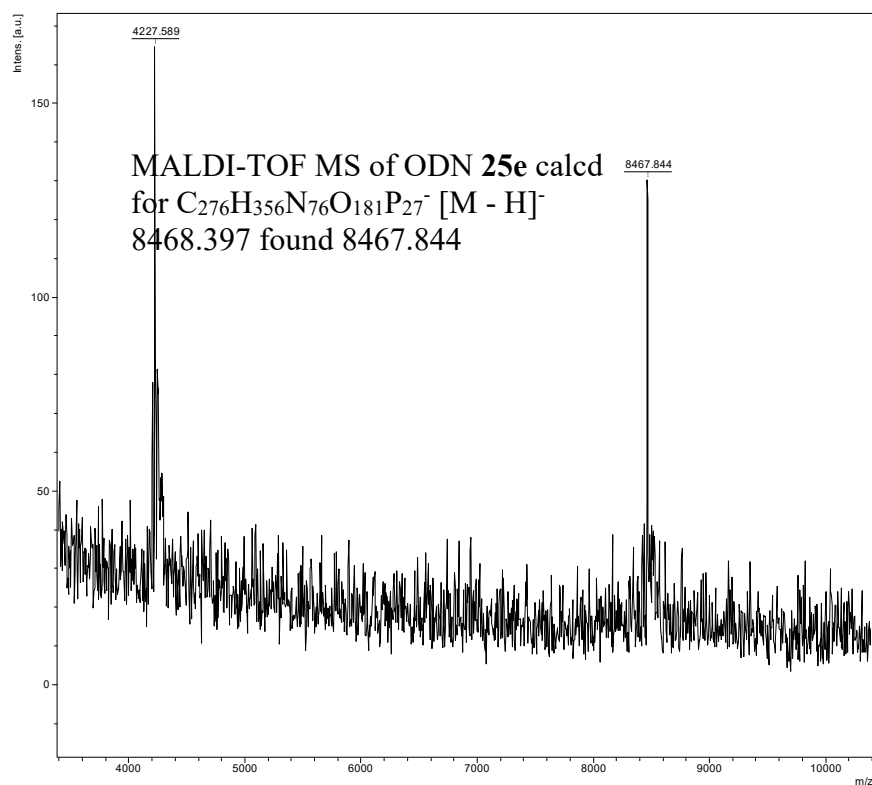

$OD_{260}$  of the ODN **25e** (28-mer) obtained from the 0.52  $\mu\text{mol}$  synthesis is 1.23.

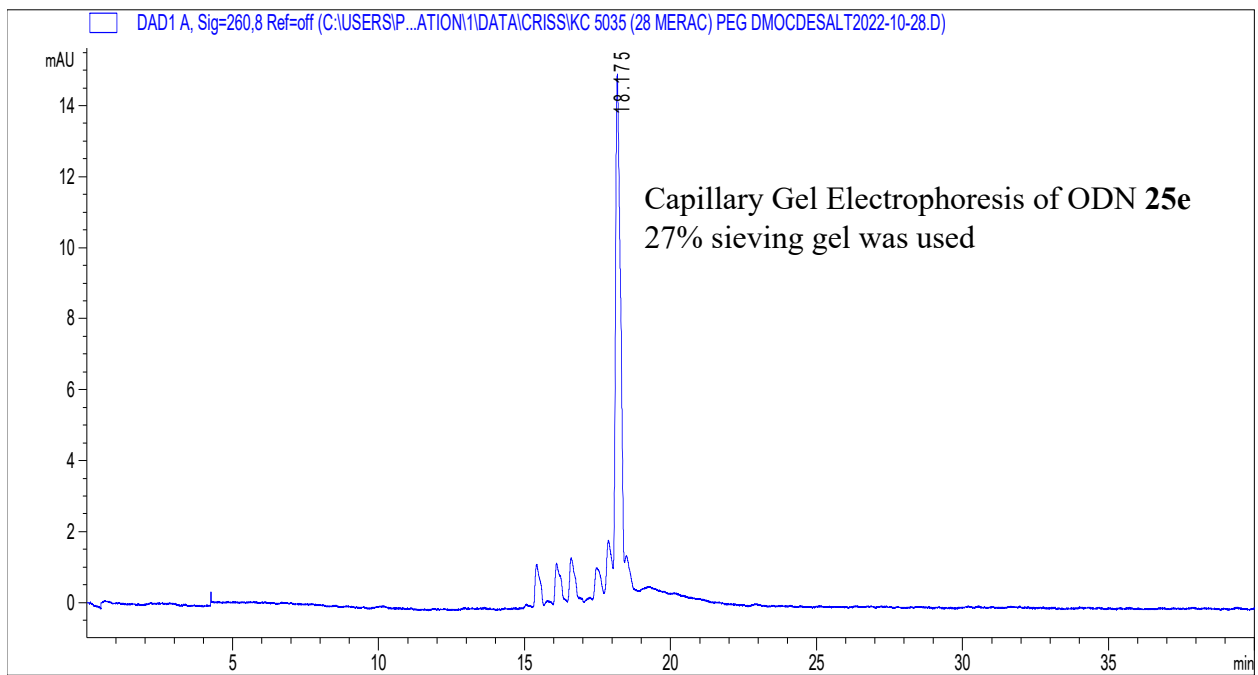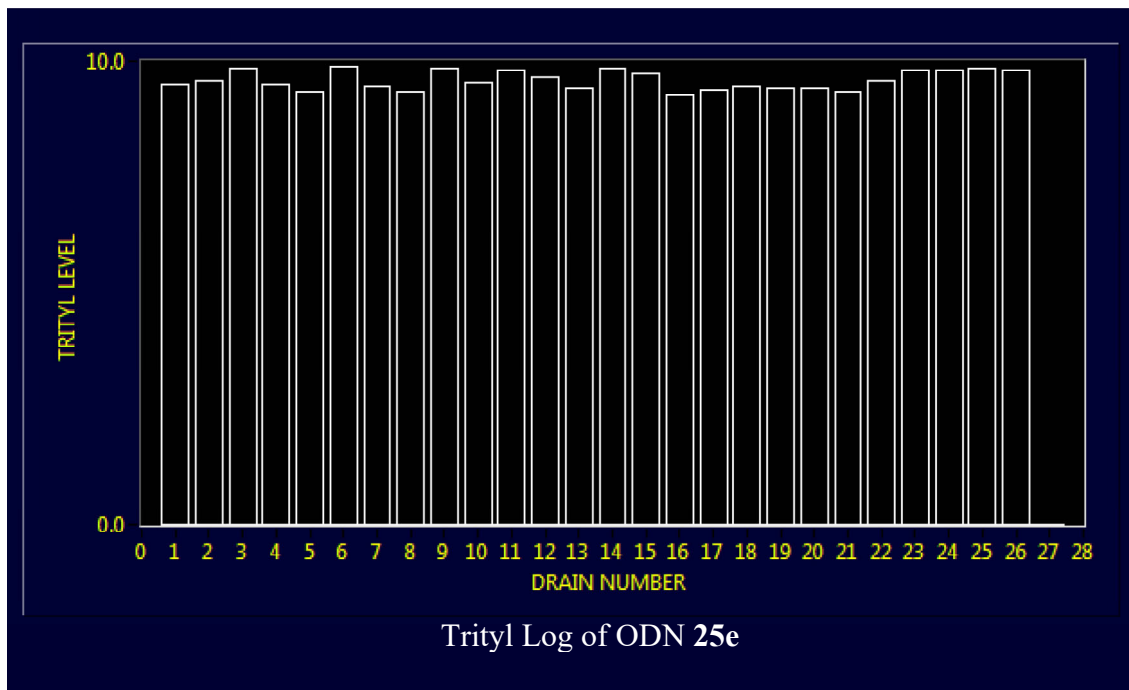

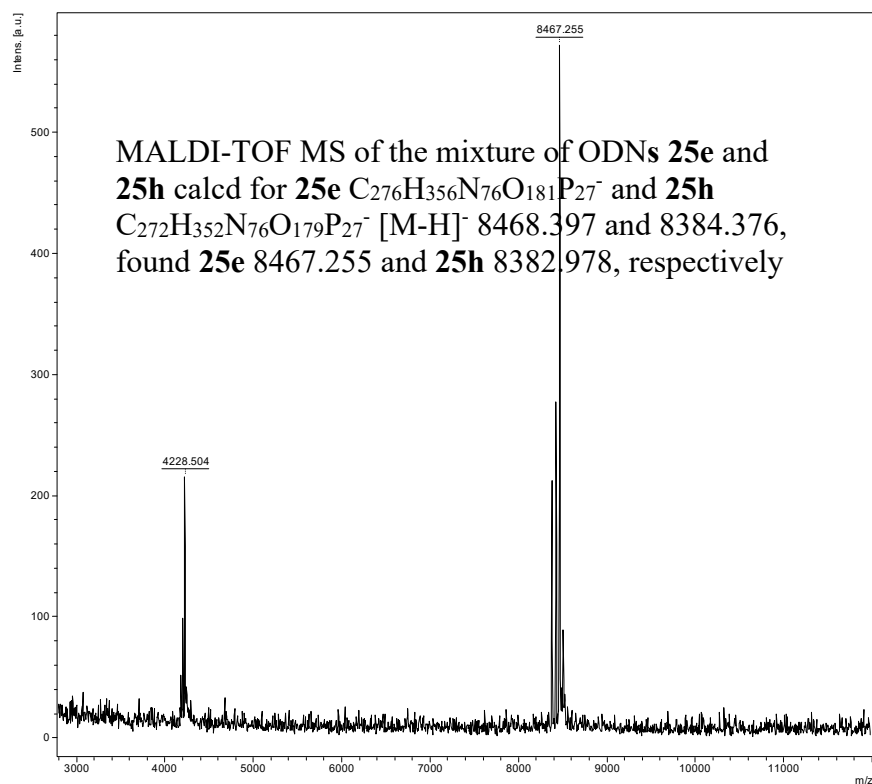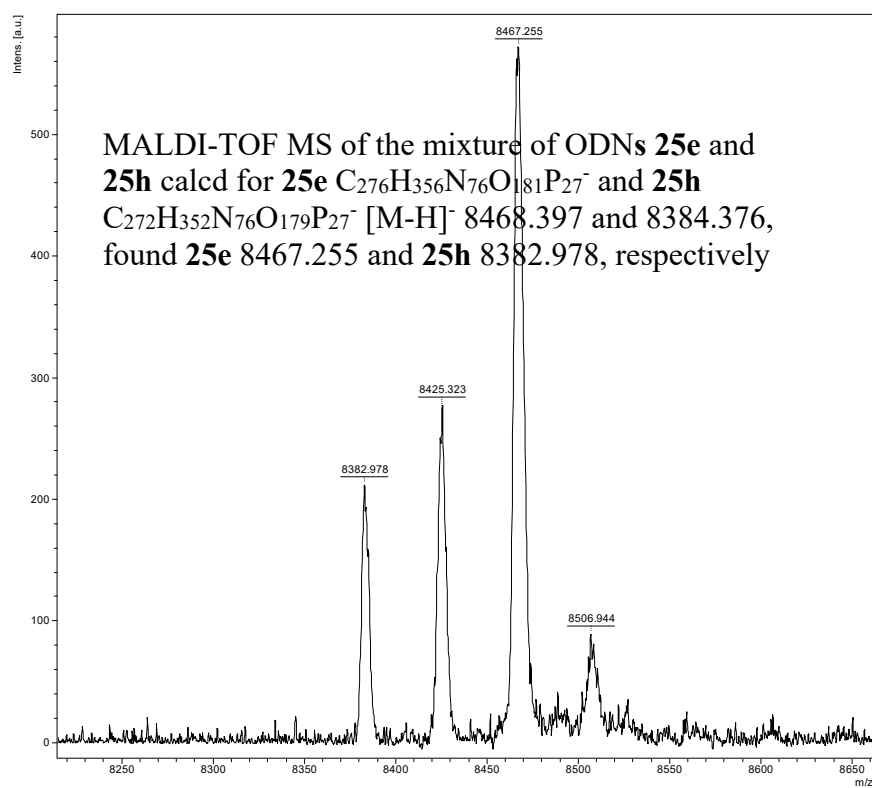

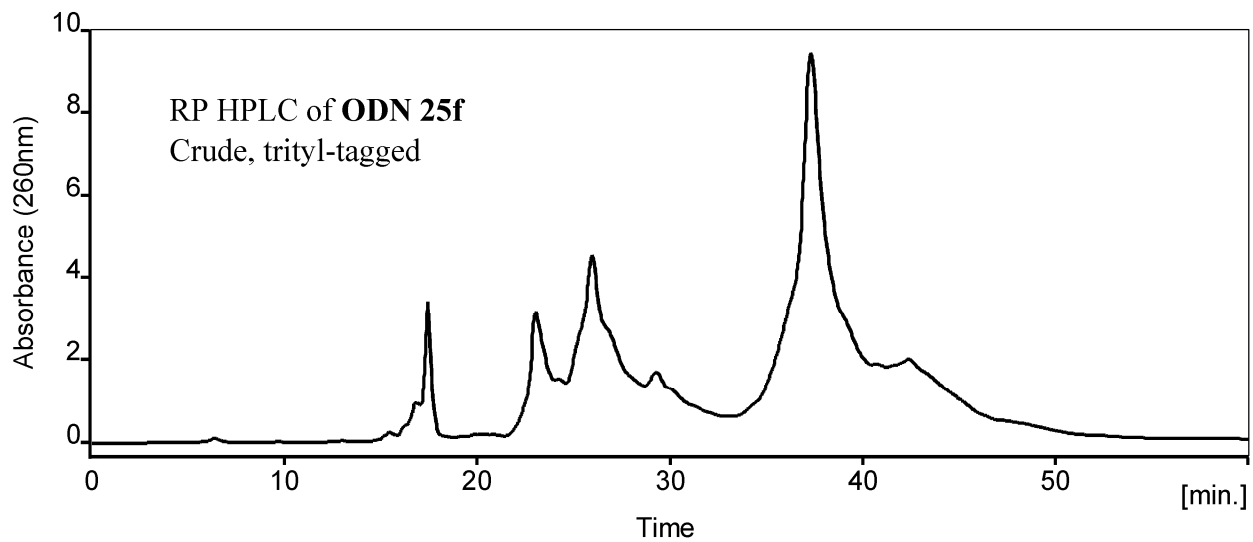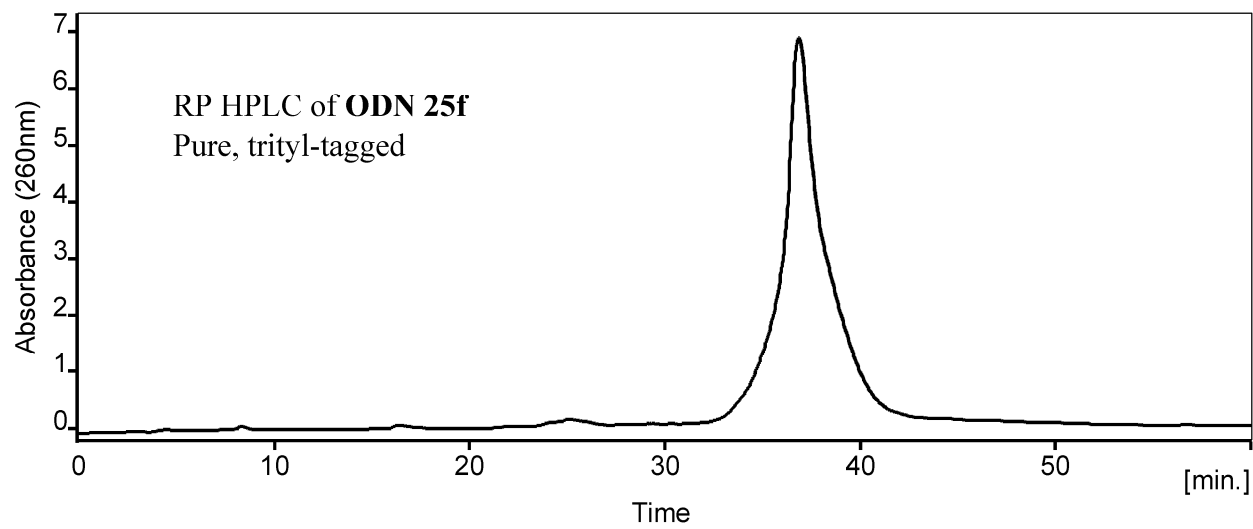

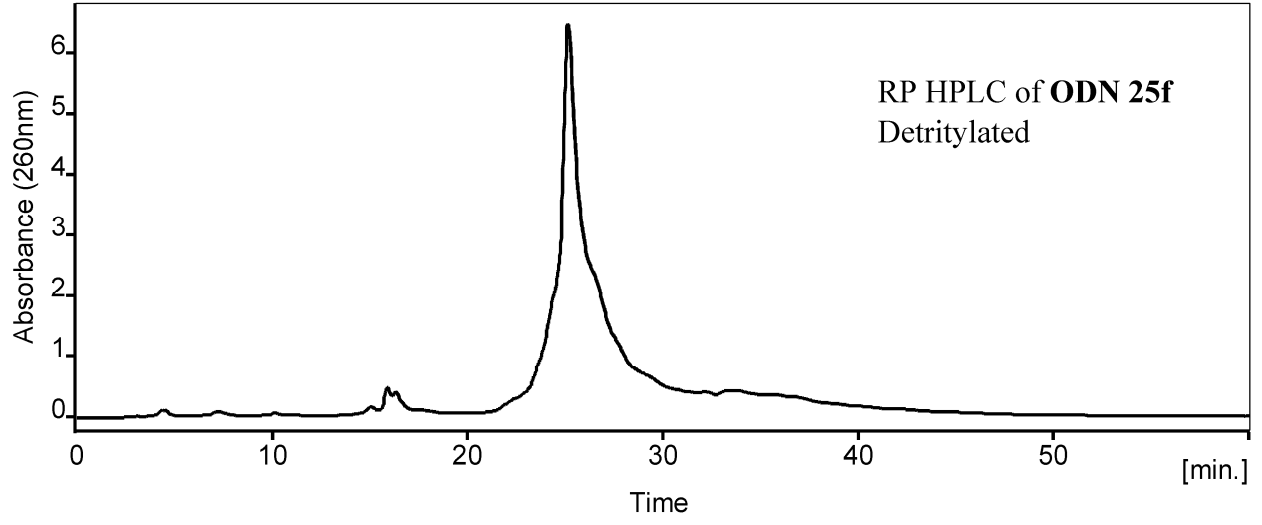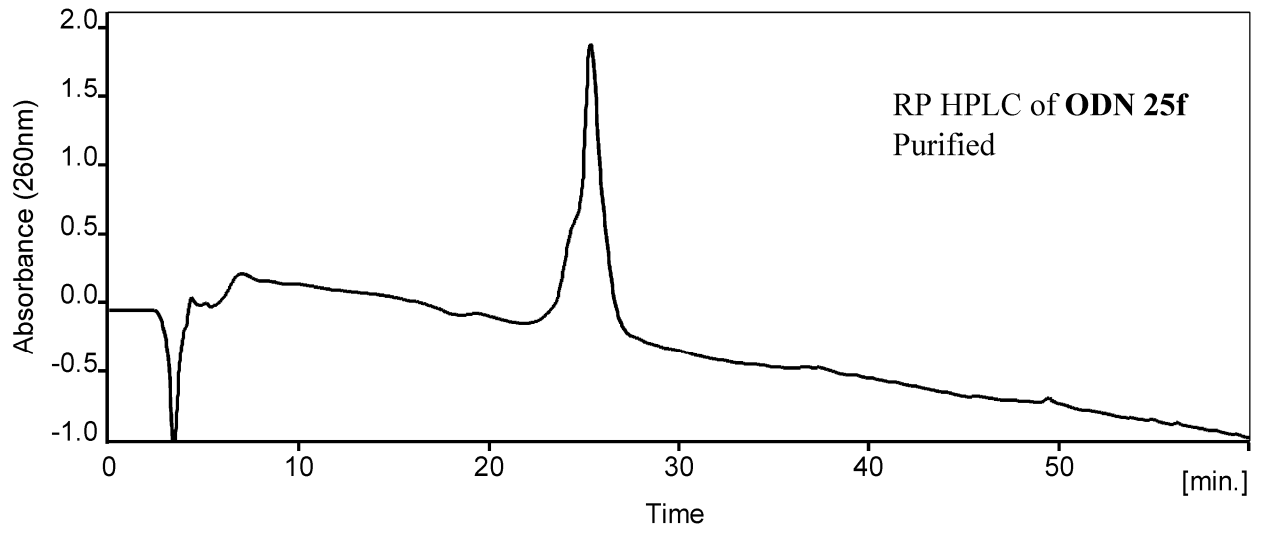



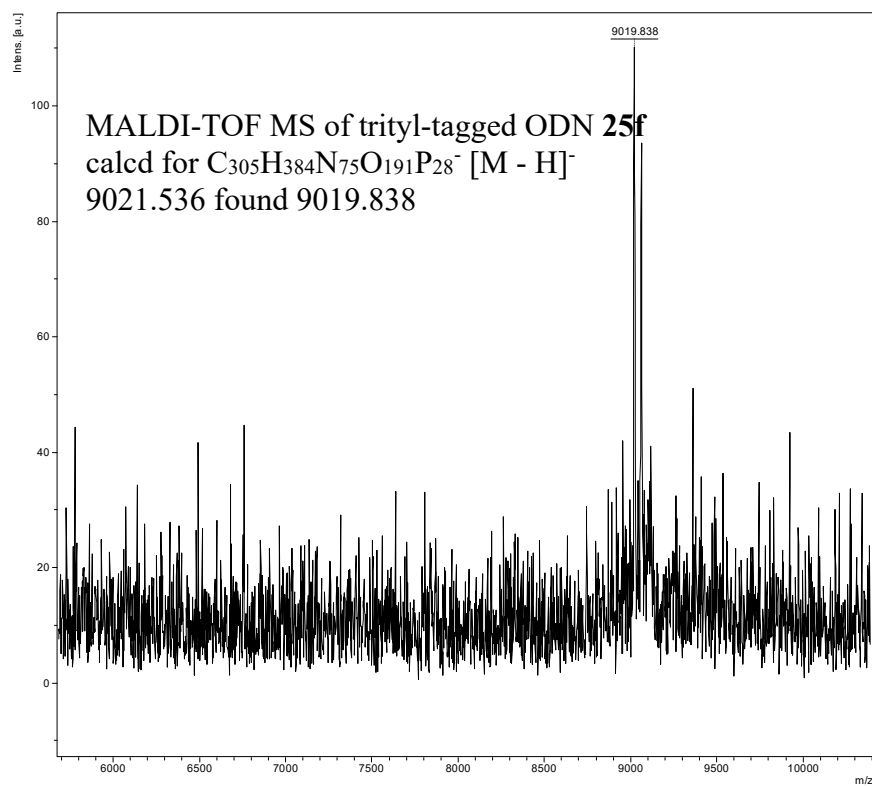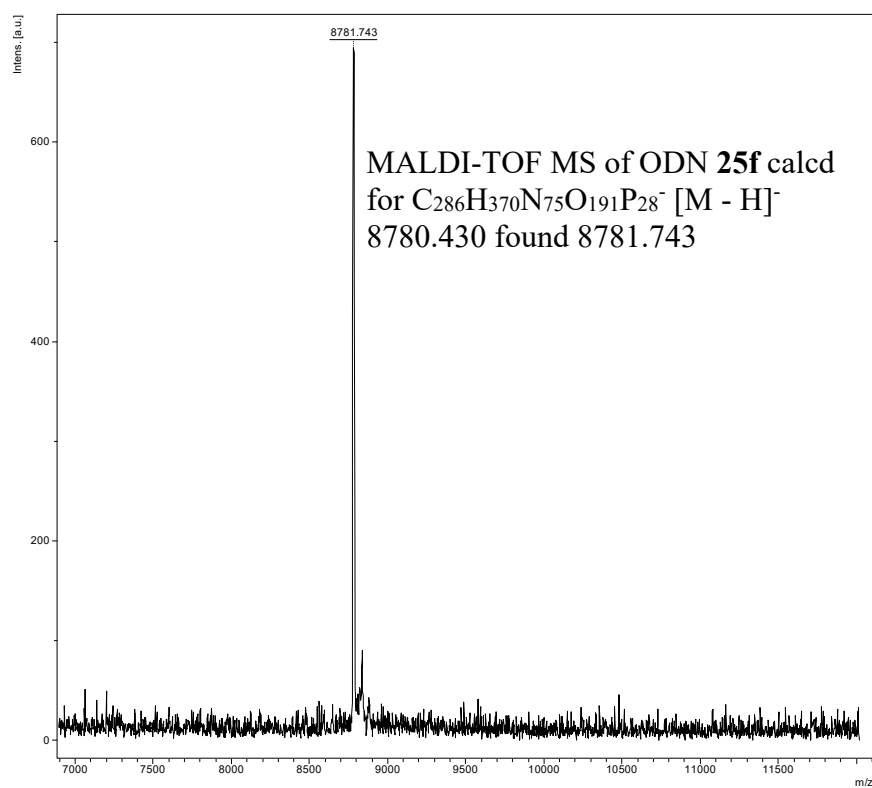

$OD_{260}$  of the ODN **25f** (29-mer) obtained from the 0.52  $\mu\text{mol}$  synthesis is 0.91.

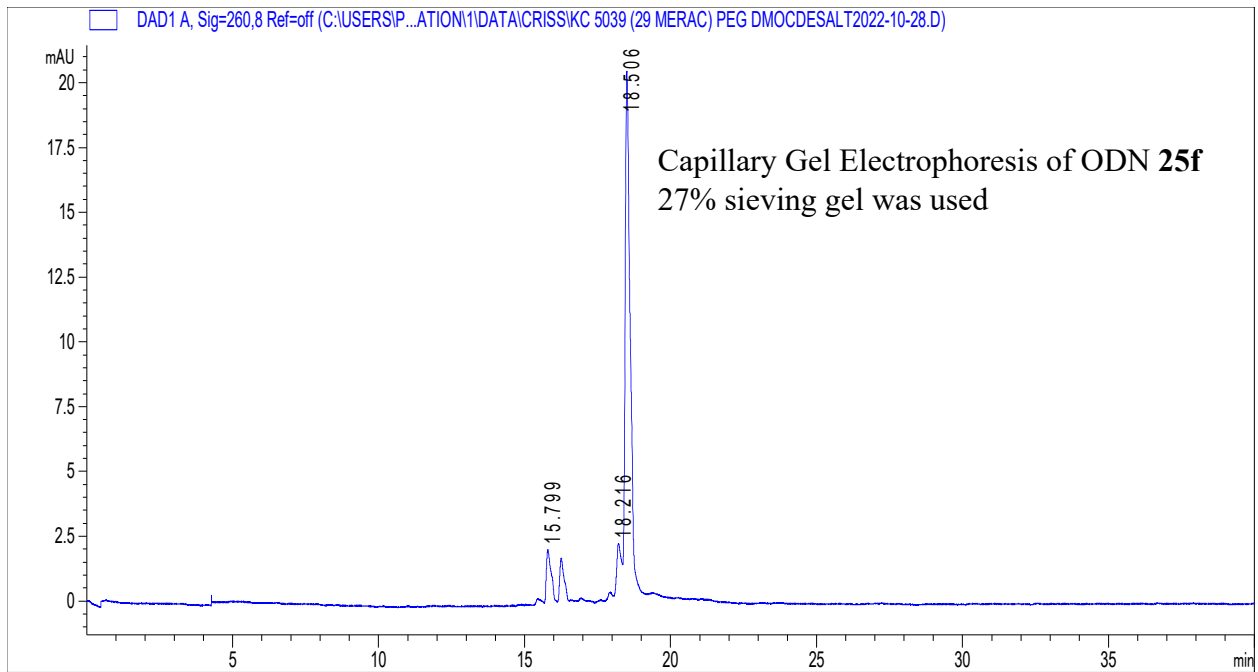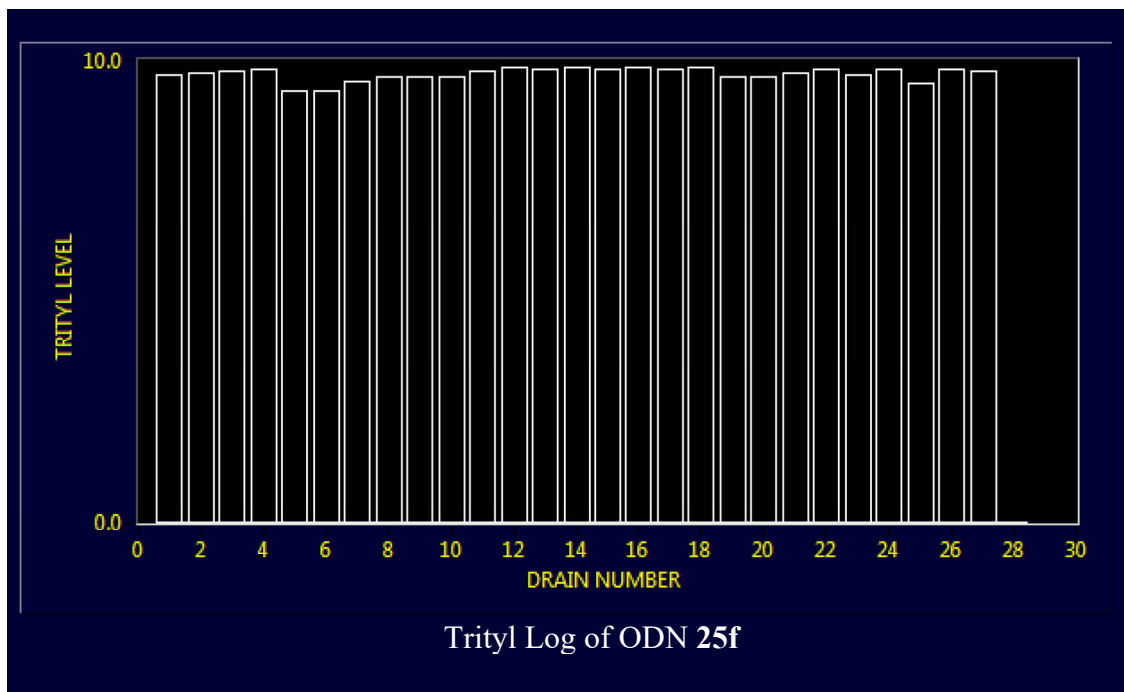

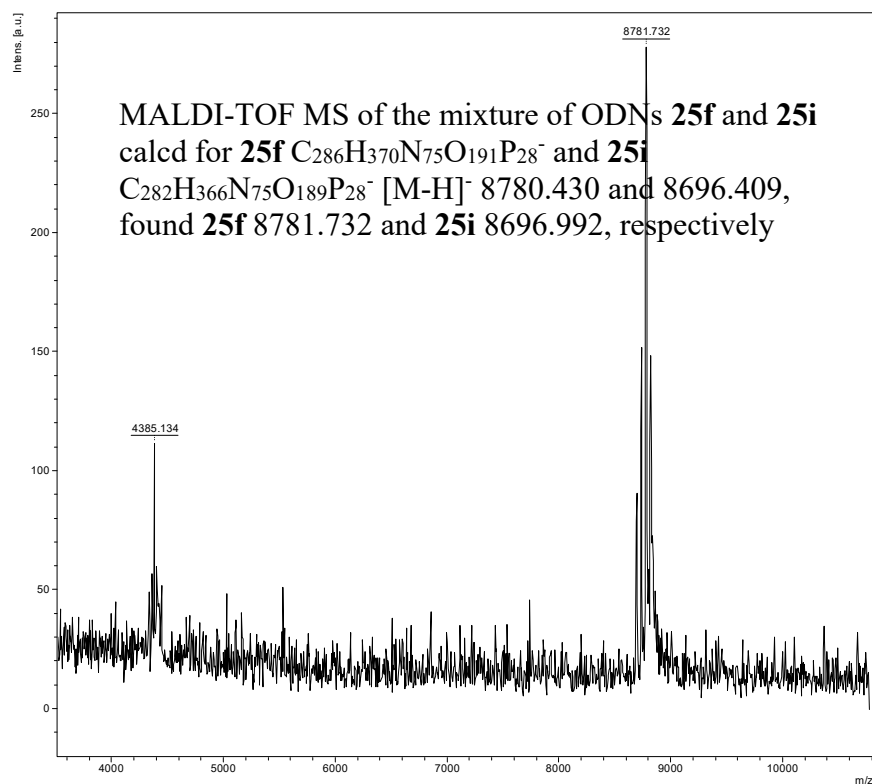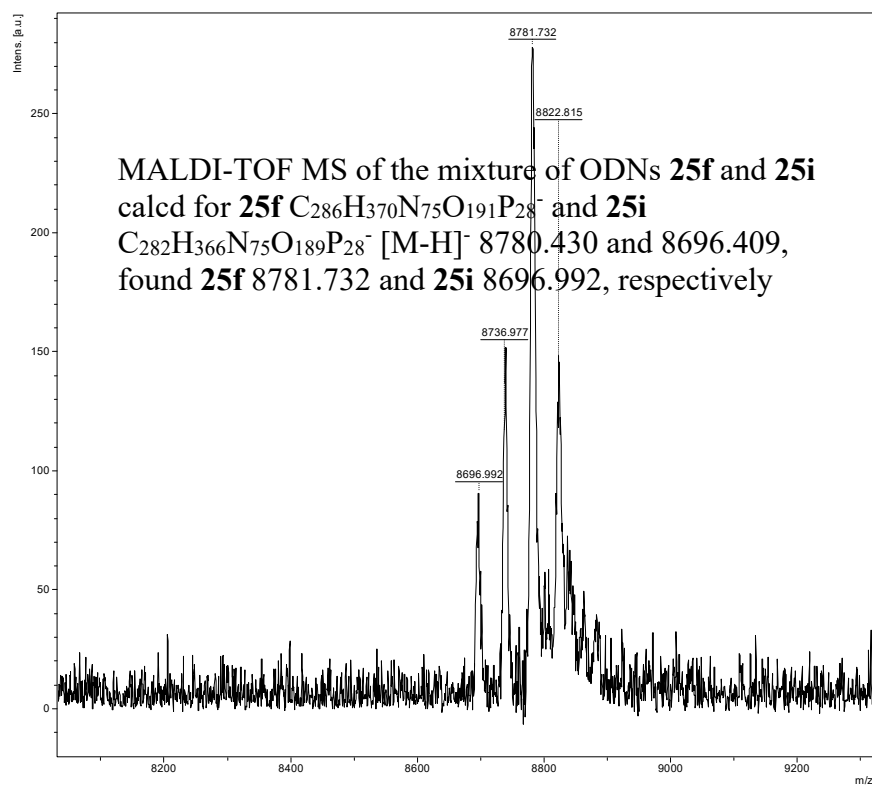

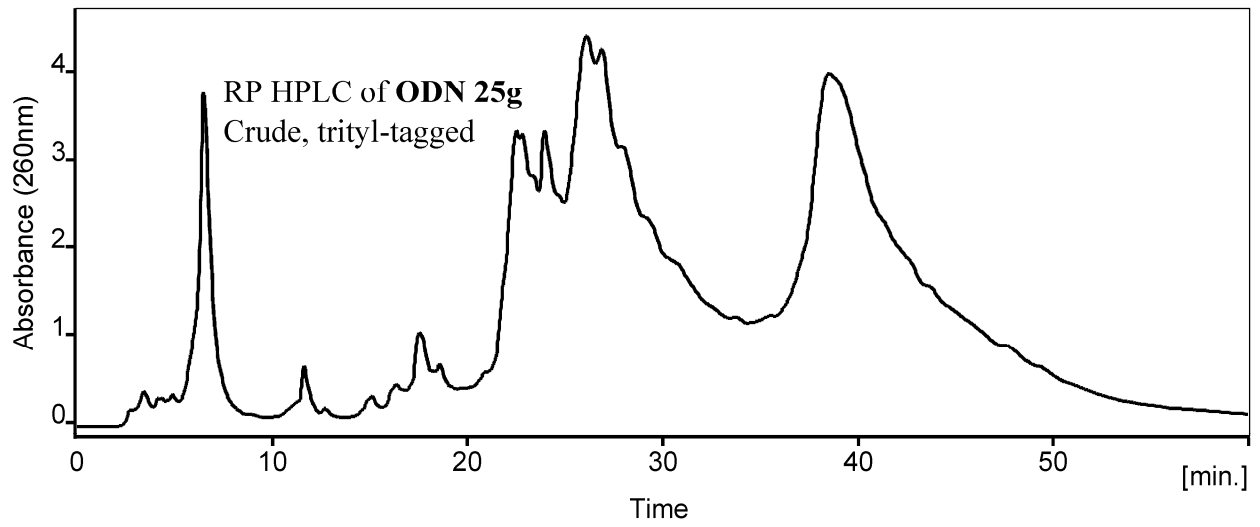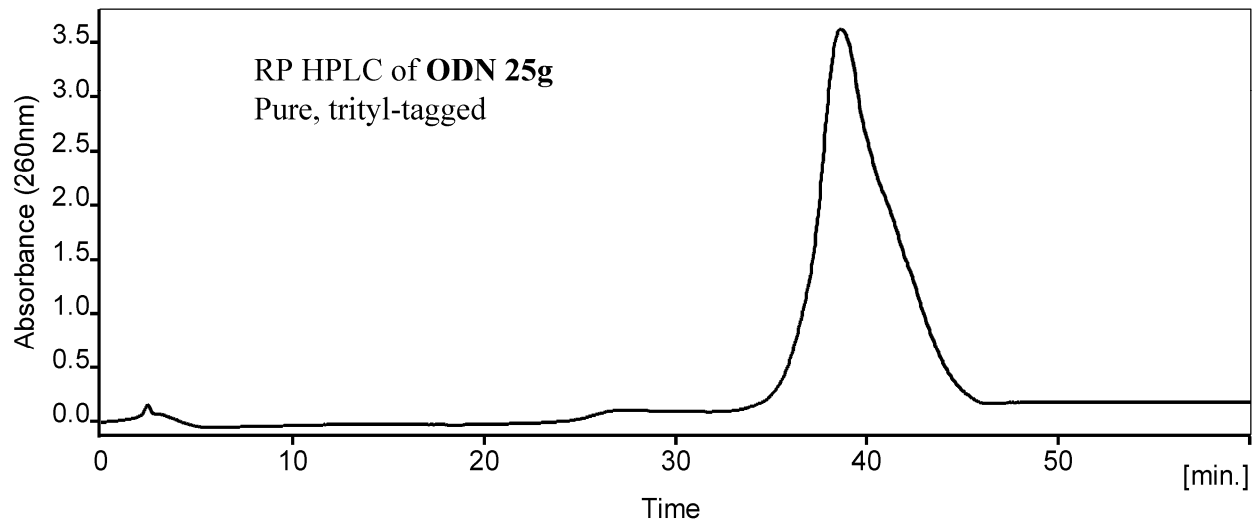

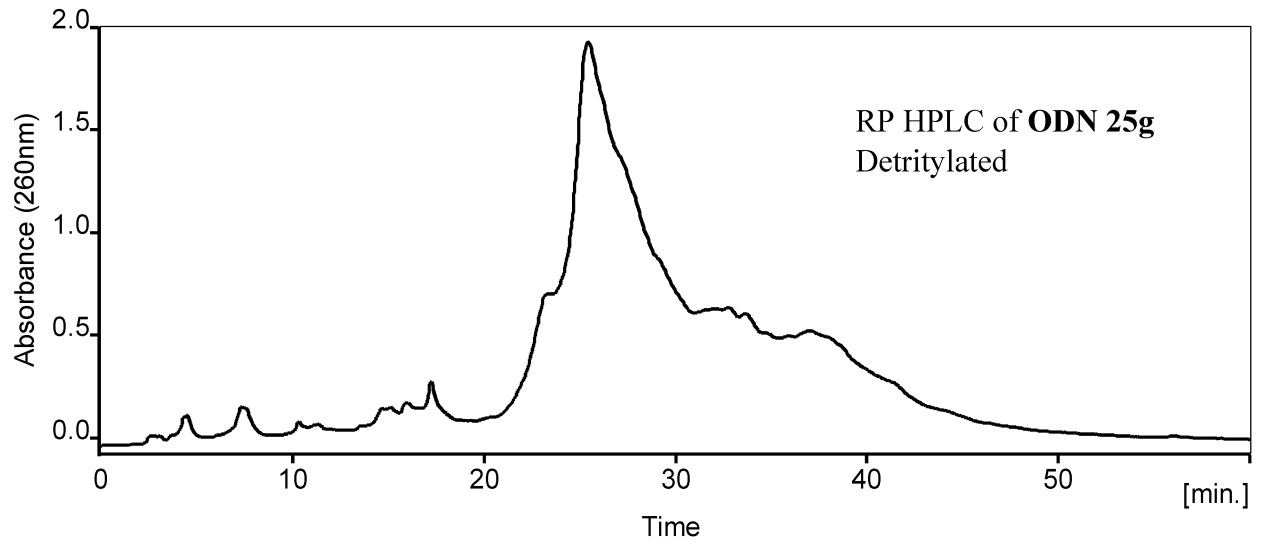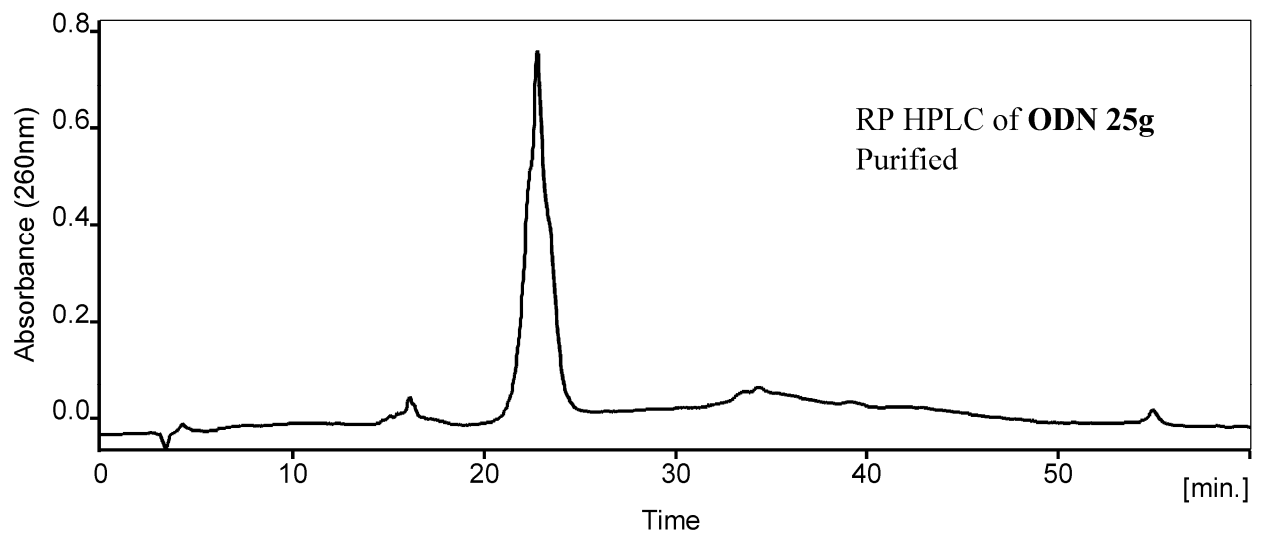

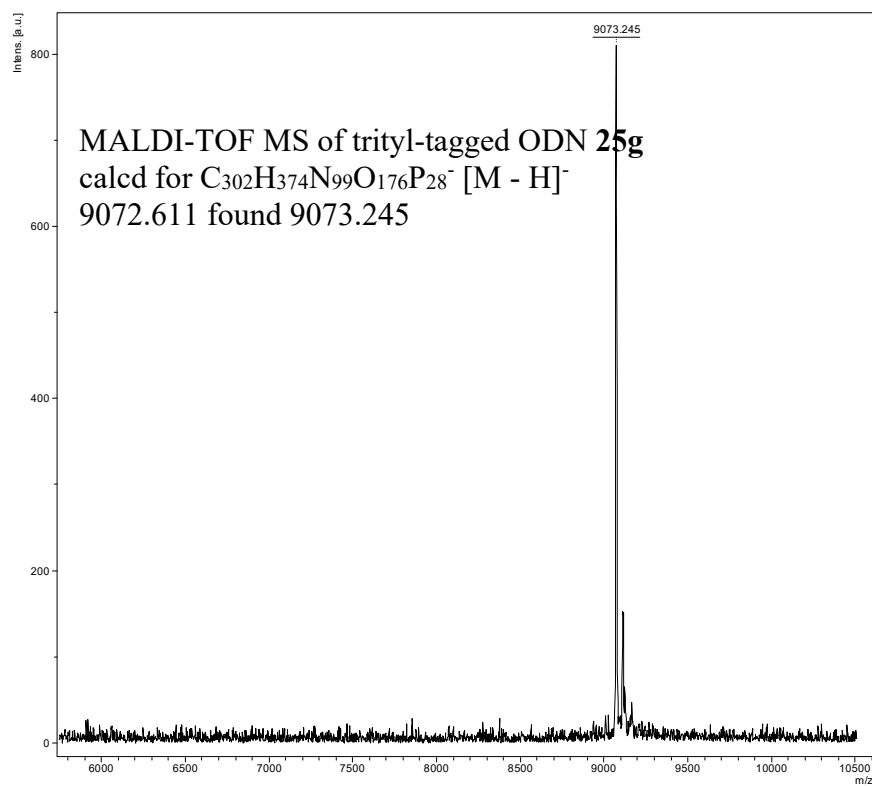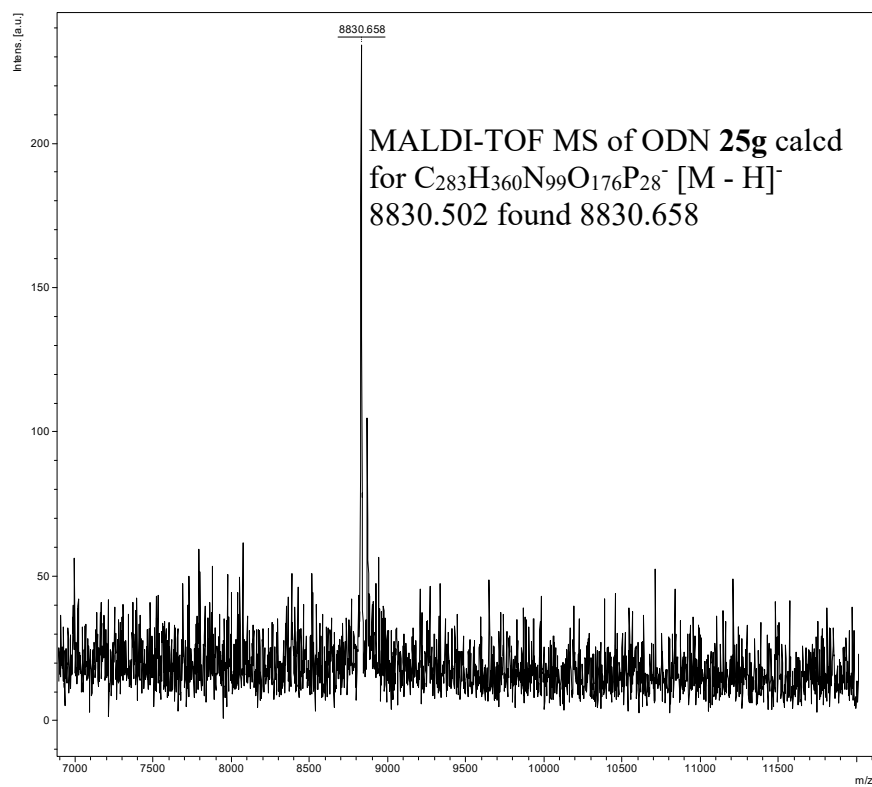

OD<sub>260</sub> of the ODN **25g** (29-mer) obtained from the 0.52  $\mu\text{mol}$  synthesis is 0.24.

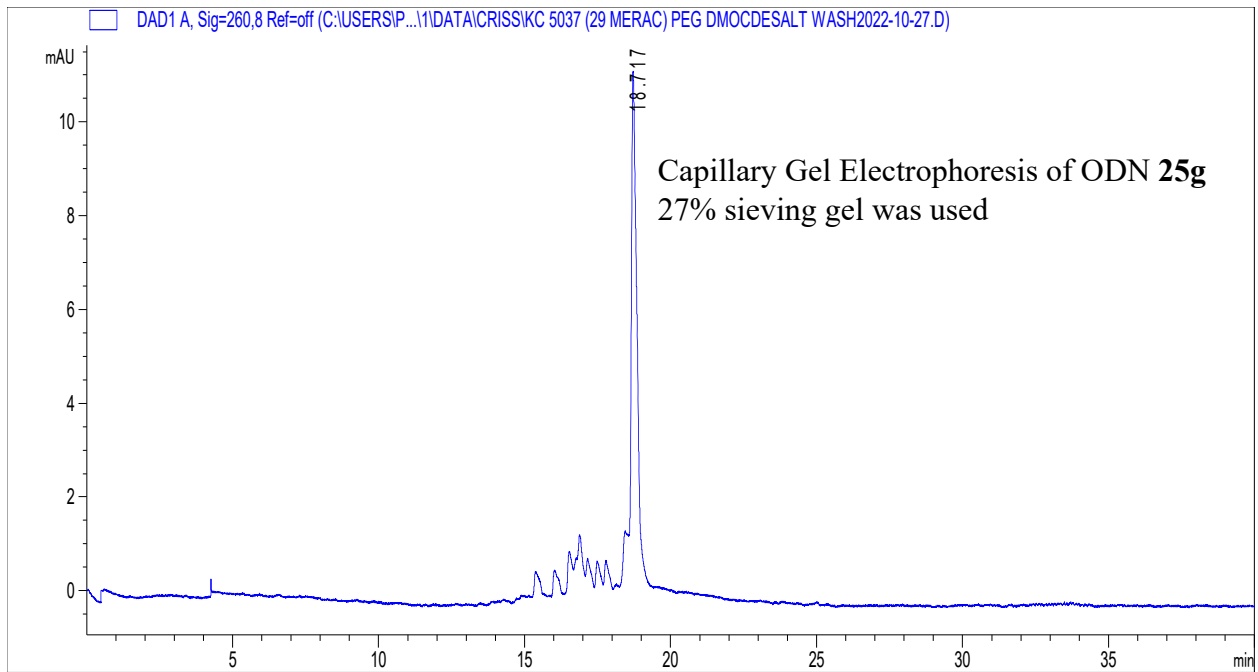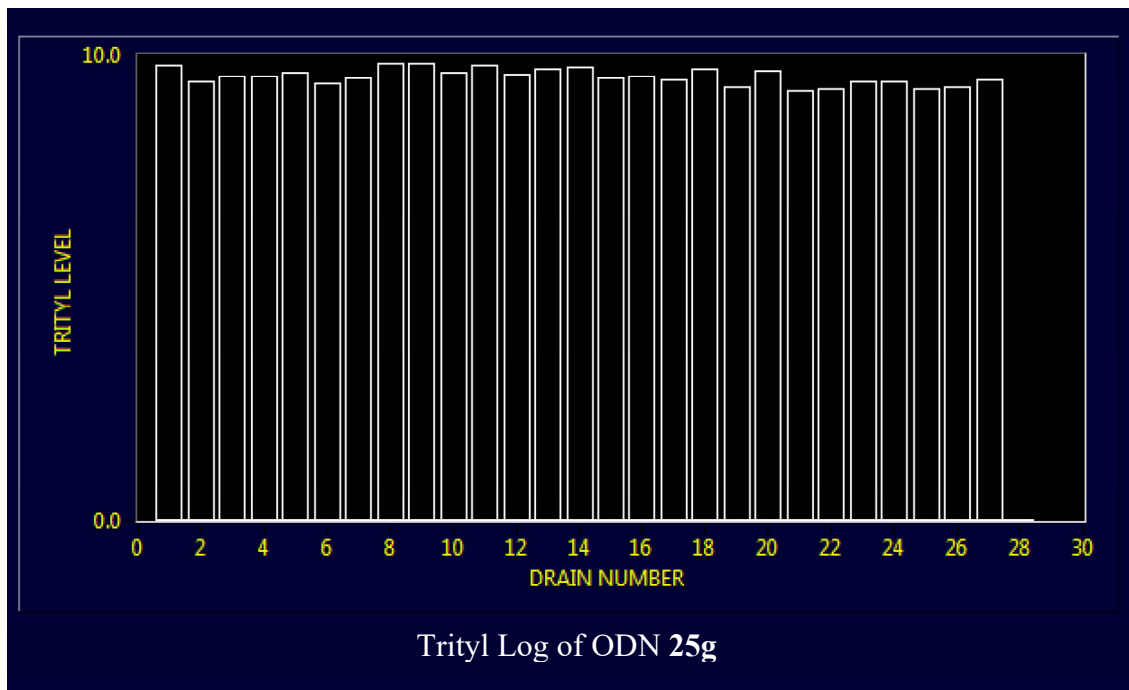

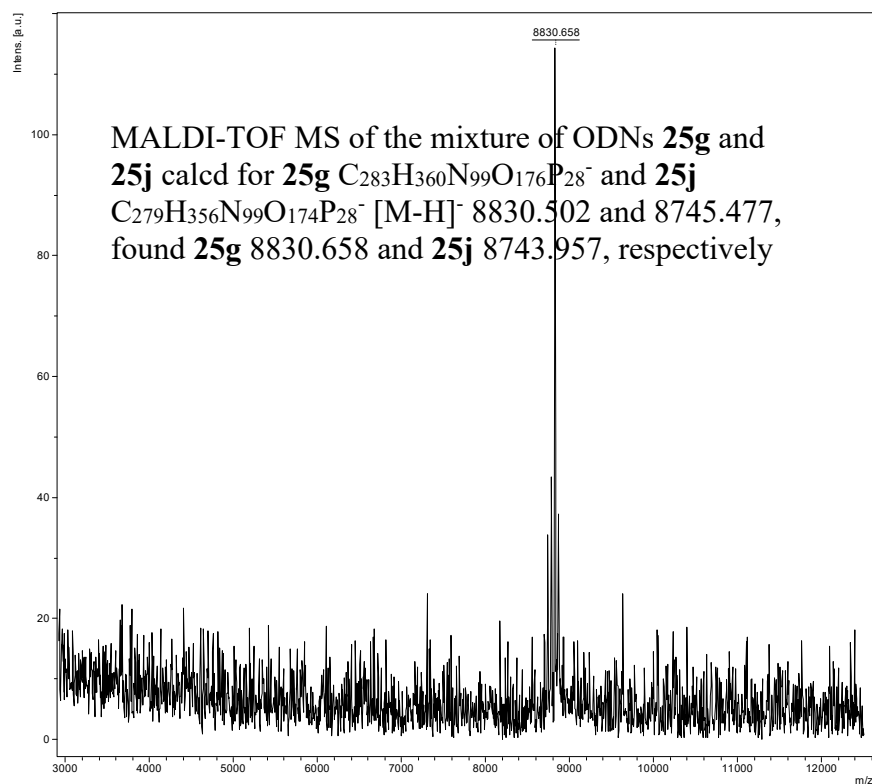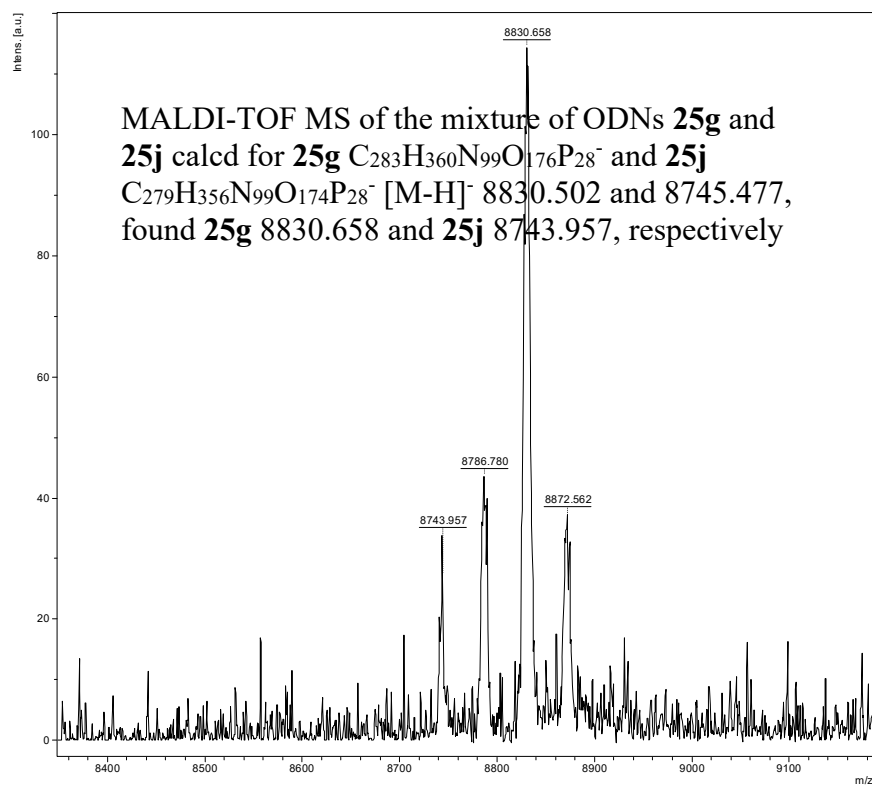



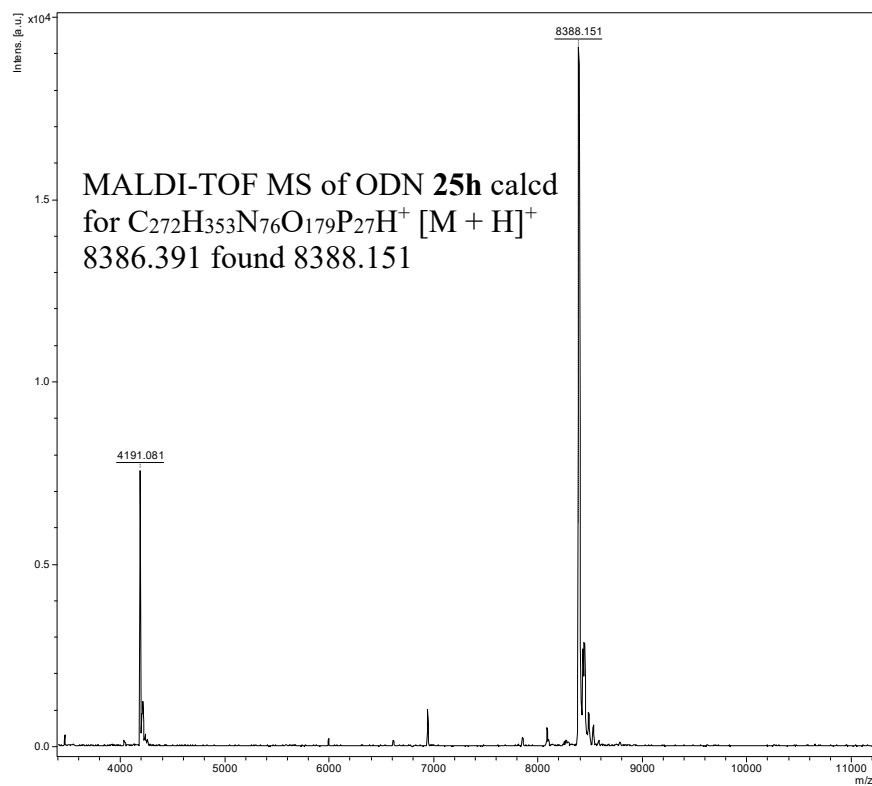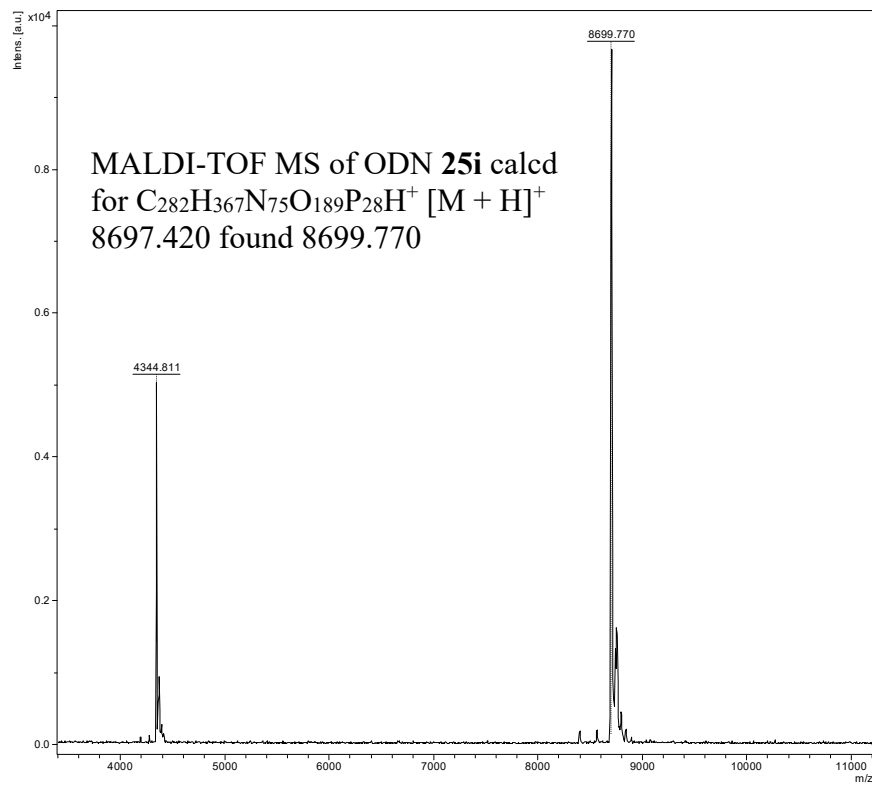

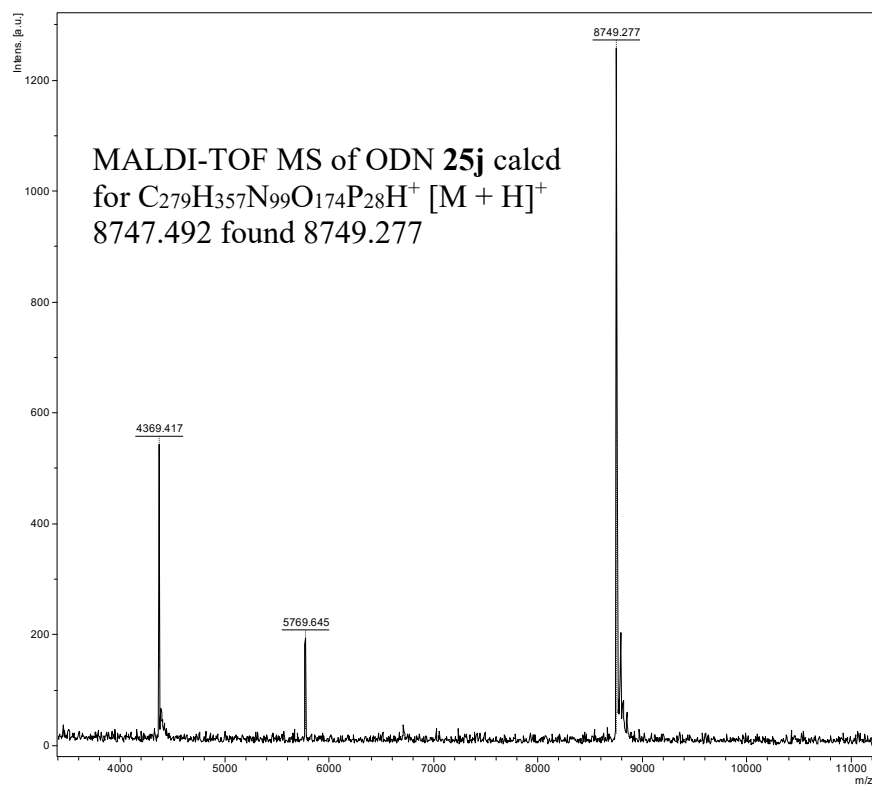

Supplement: d3ob01495a2.pdf [file d3ob01495a2.pdf]
