# Supplementary material for: PEGylated Dmoc phosphoramidites for sensitive oligodeoxynucleotide synthesis
Source: Royal Society of Chemistry journal article supplement (doi:10.1039/d3ob01495a), 2023-01-01

*ESI for*

## **PEGylated Dmoc Phosphoramidites for Sensitive Oligodeoxynucleotide Synthesis**

Komal Chillar, Yipeng Yin, Alexander Apostle and Shiyue Fang\*

Department of Chemistry and Health Research Institute, Michigan Technological University,  
1400 Townsend Drive, Houghton, MI, 49931, USA

Email: shifang@mtu.edu

**Images of  $^1\text{H}$ ,  $^{13}\text{C}$  and  $^{31}\text{P}$  NMR Spectra and TLC of New Compounds**

kc4115HNMR  
Standard H-1 Observe

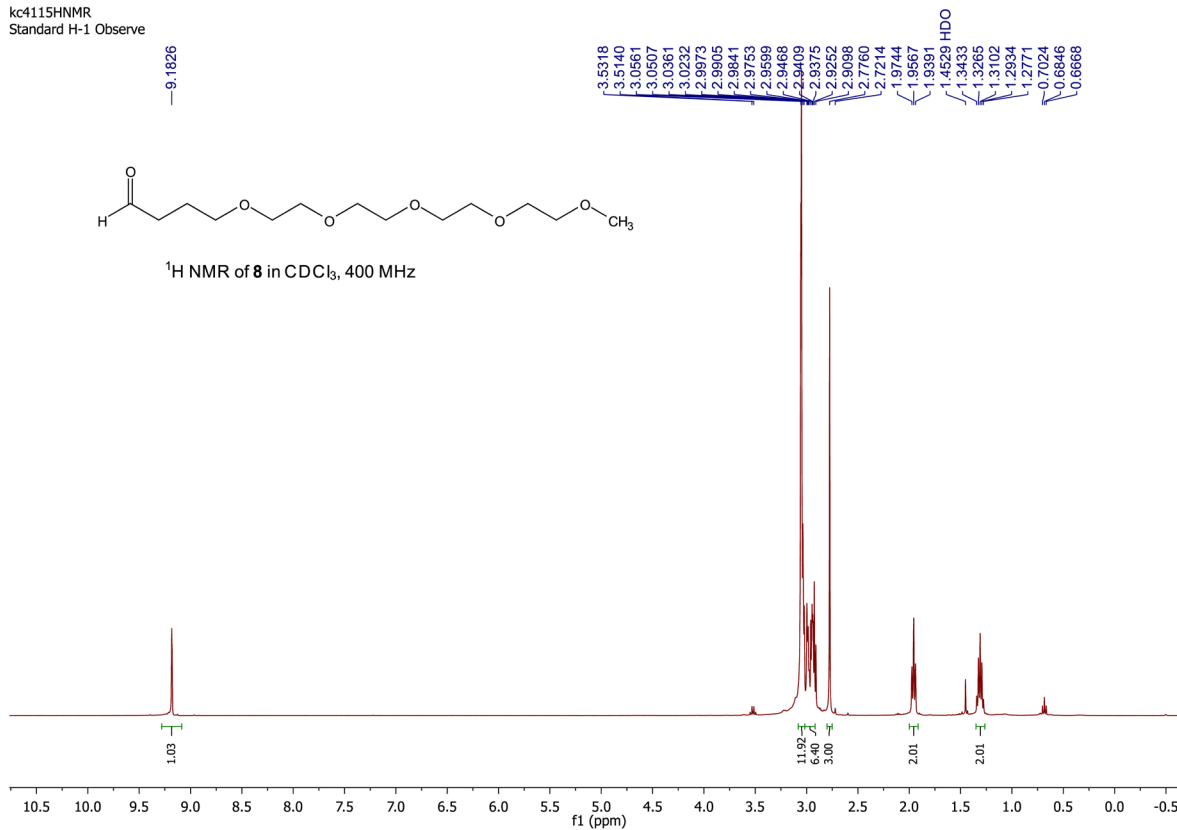

kc4115CNMR  
Standard C-13 Observe

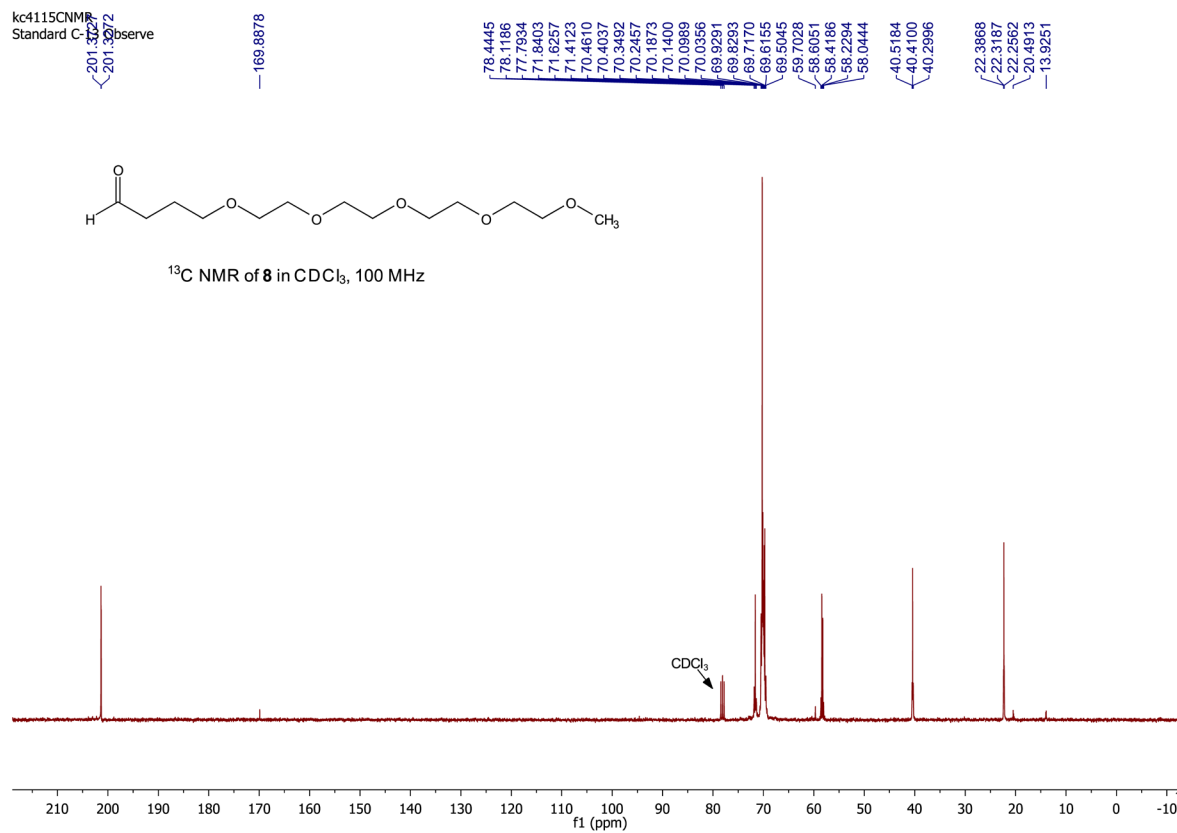







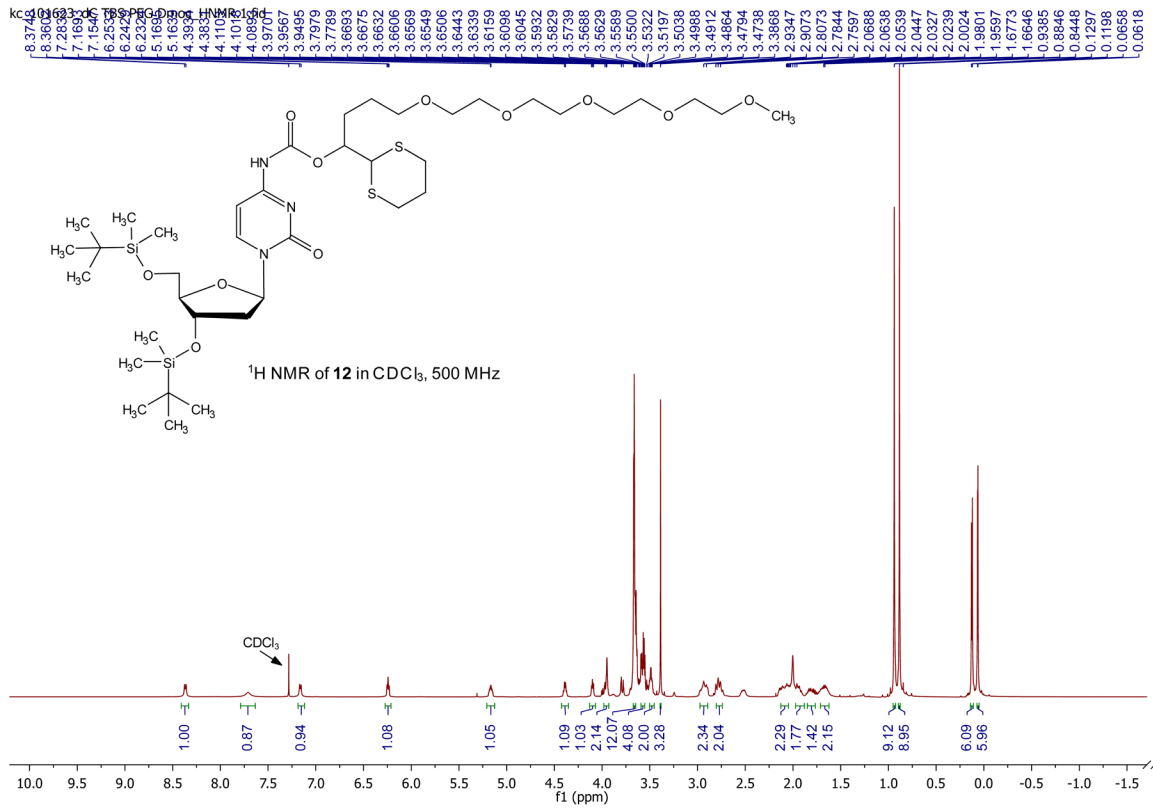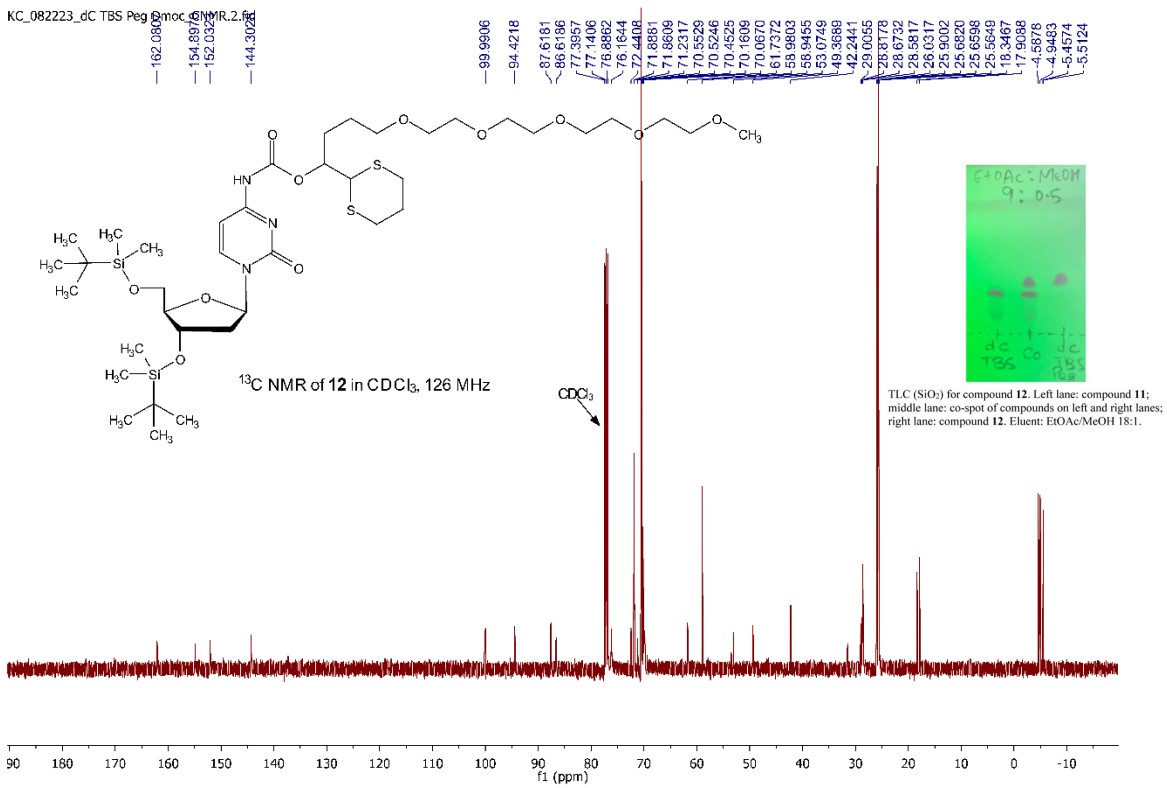

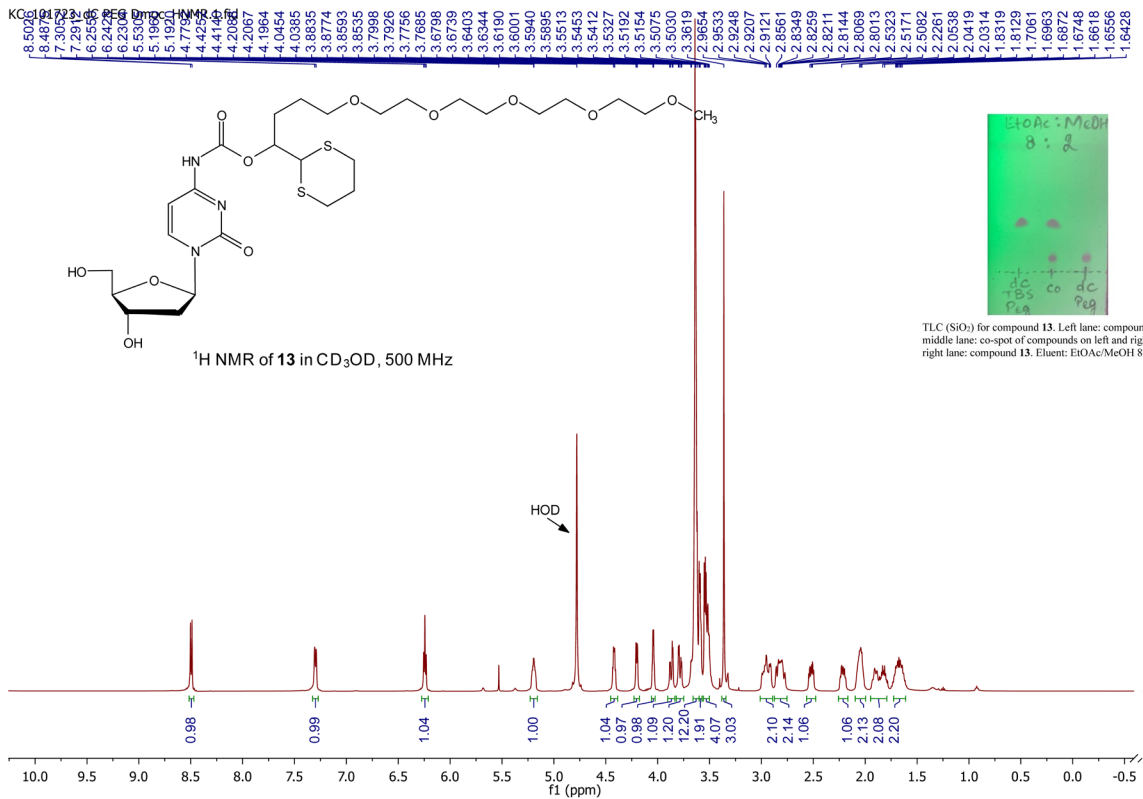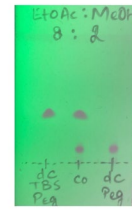

TLC (SiO<sub>2</sub>) for compound 13. Left lane: compound 12; middle lane: co-spot of compounds on left and right lanes; right lane: compound 13. Eluent: EtOAc/MeOH 8:2.

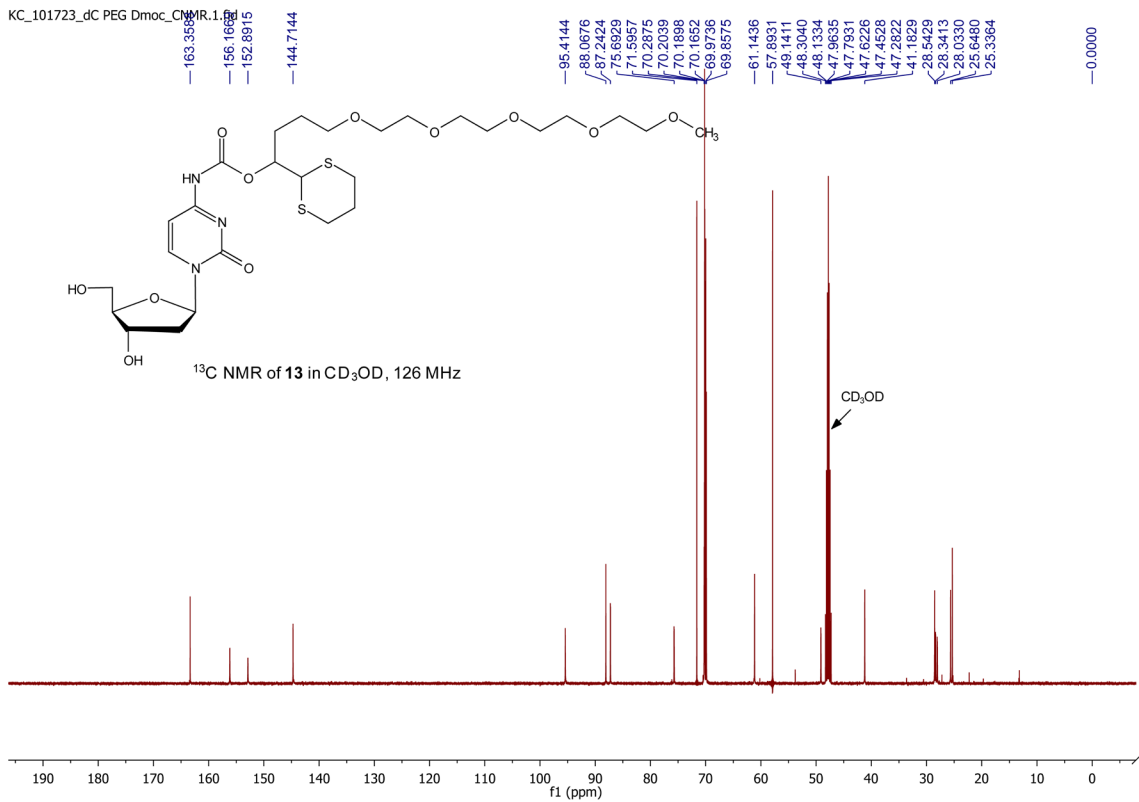

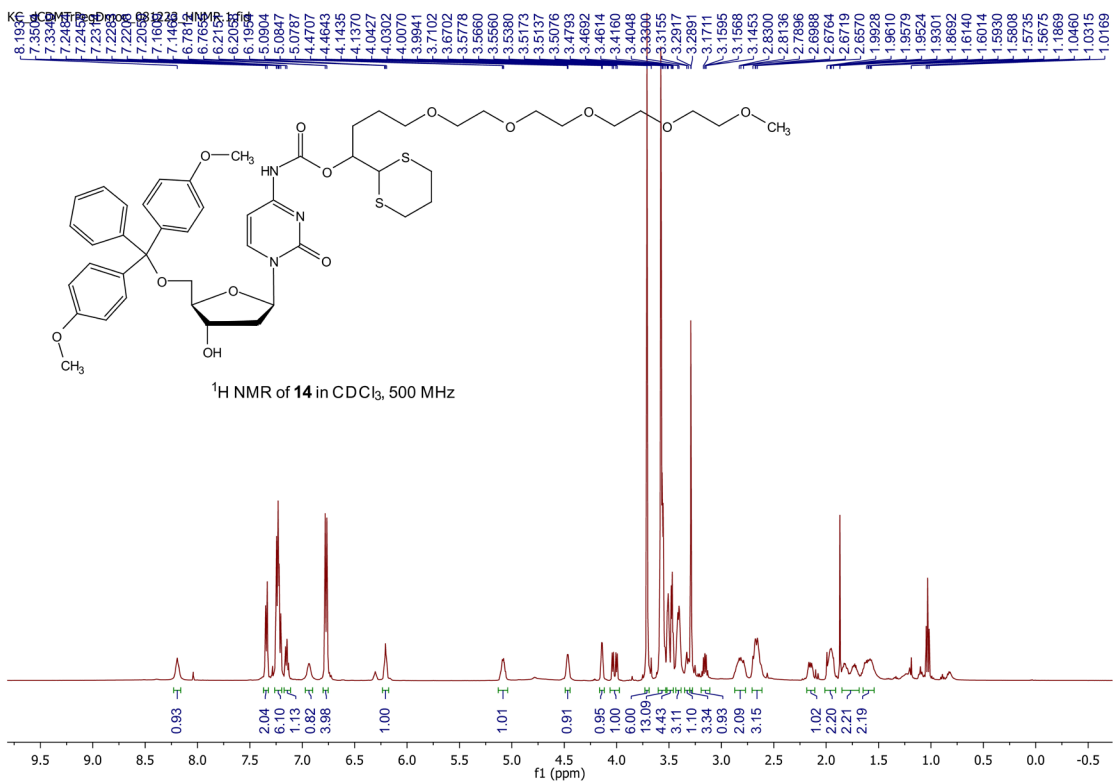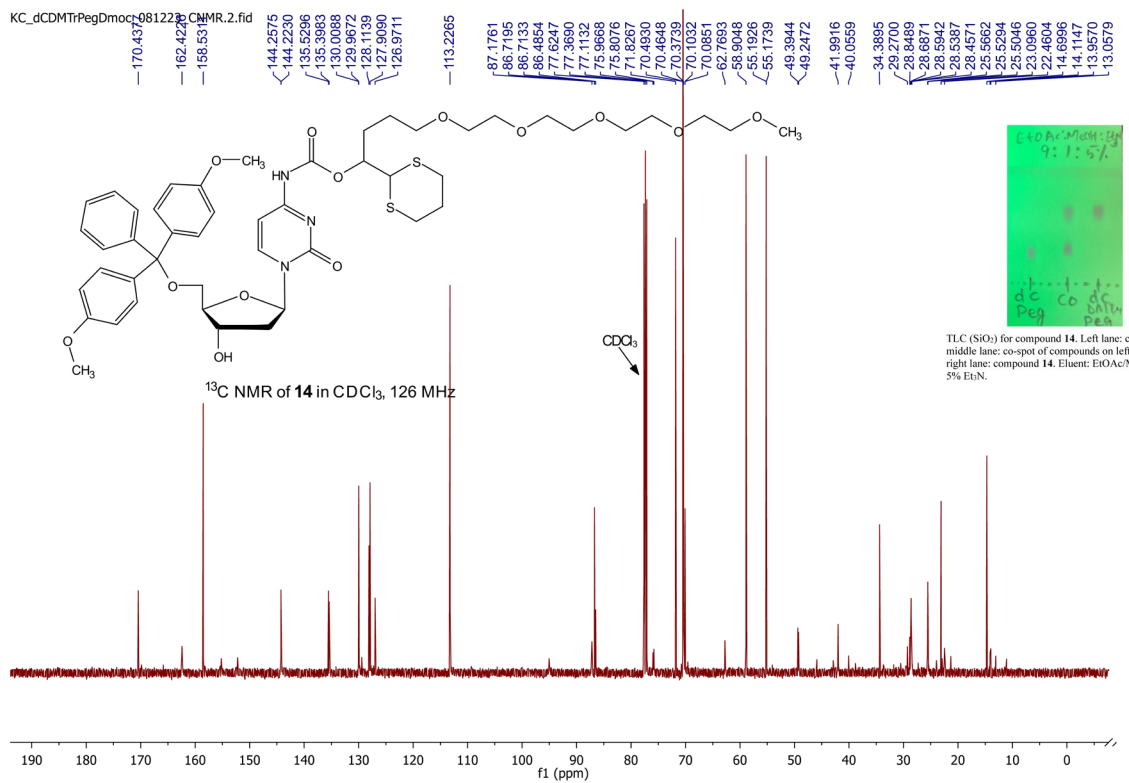

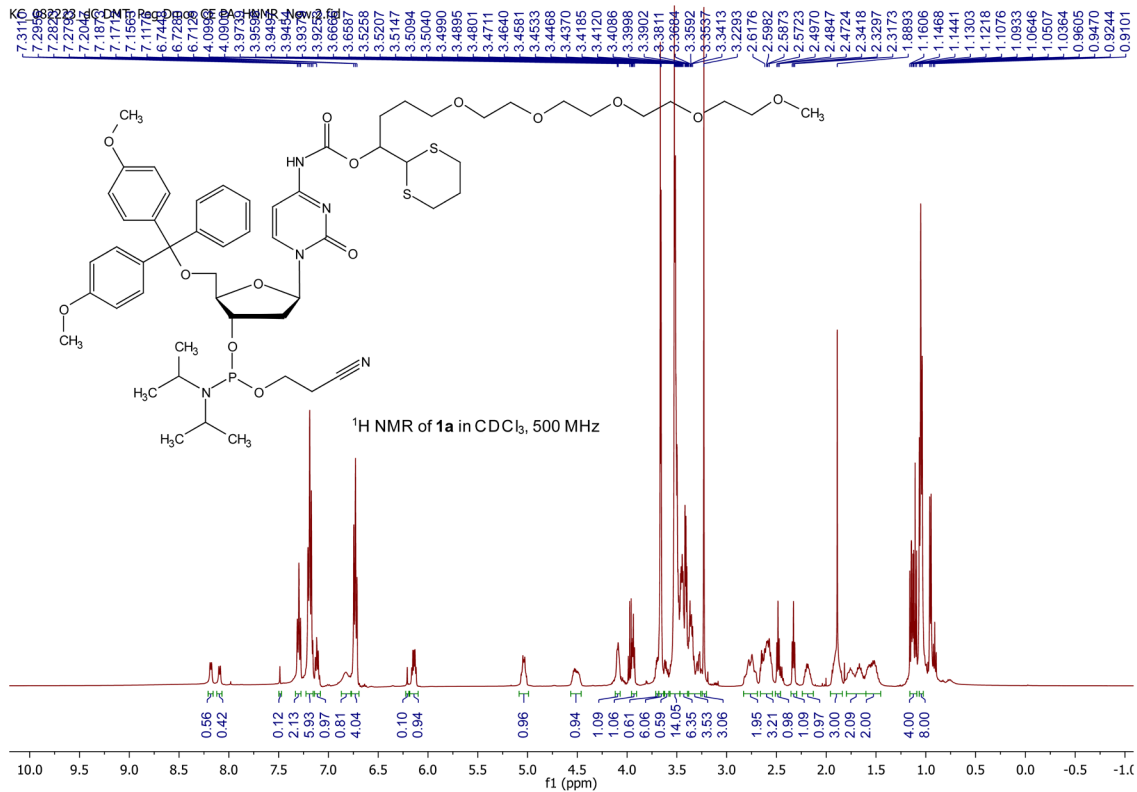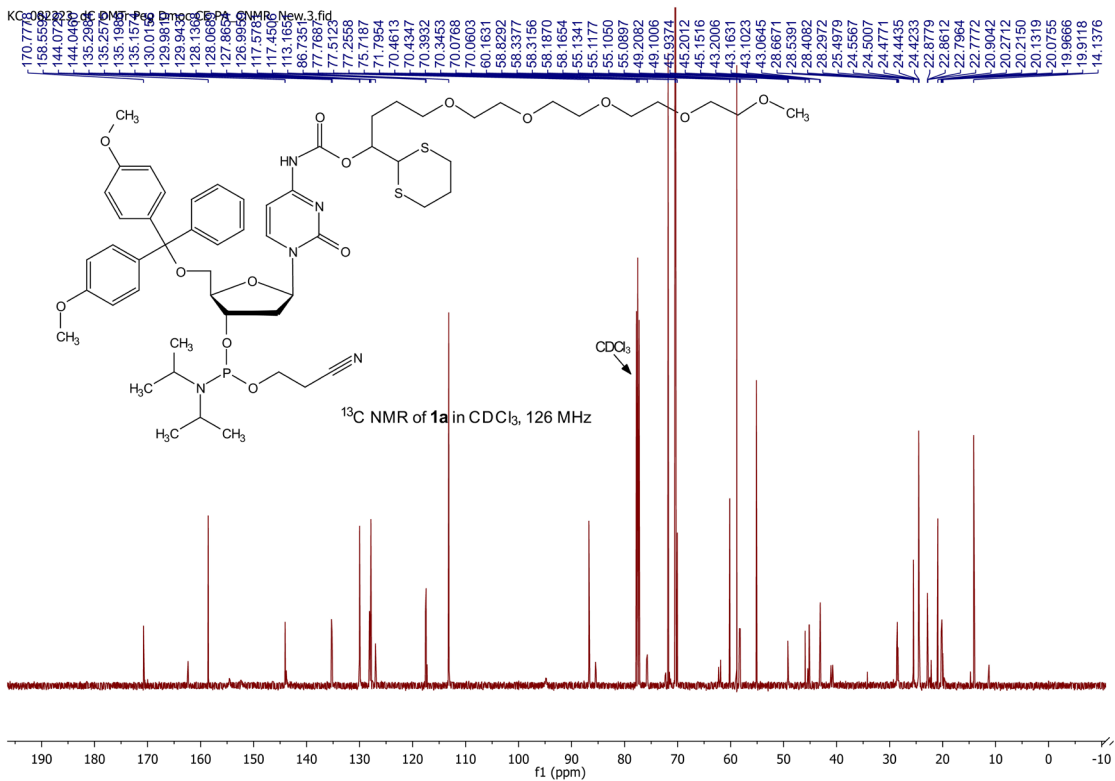

KC\_082223\_dC DMTr Peg Dmoc CE PA\_PNMR\_New.1.fid

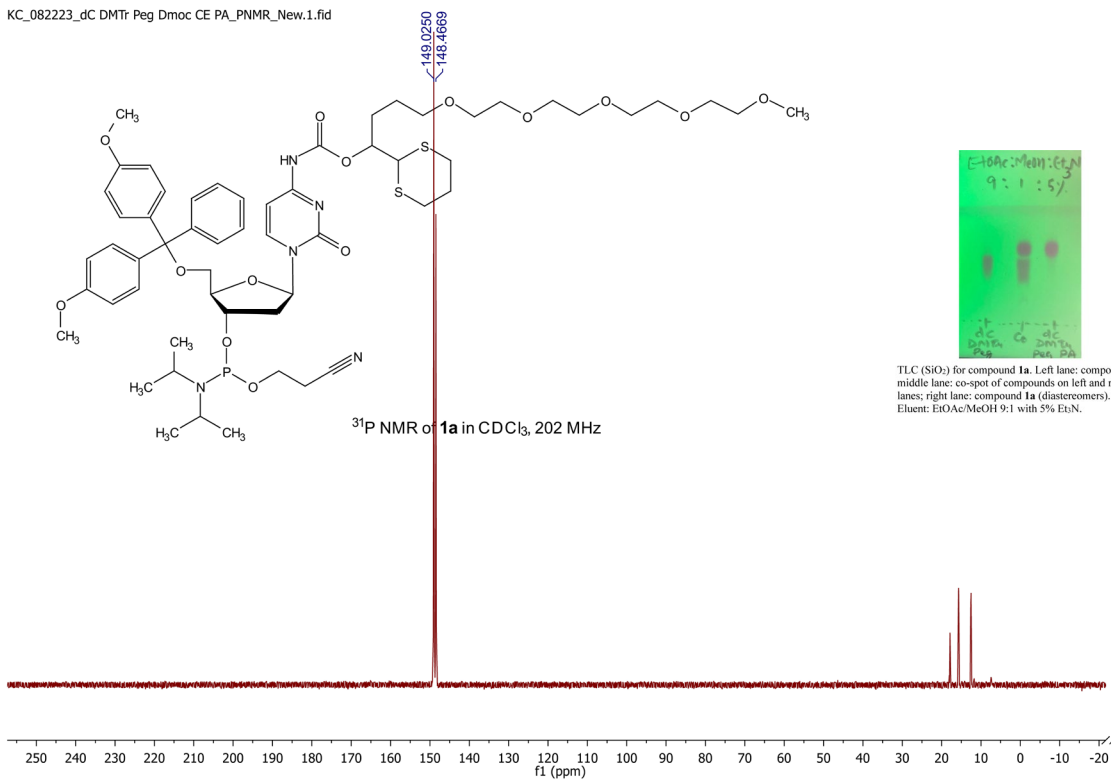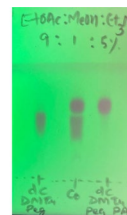

TLC (SiO<sub>2</sub>) for compound **1a**. Left lane: compound **14**; middle lane: co-spot of compounds on left and right lanes; right lane: compound **1a** (diastereomers). Eluent: EtOAc/MeOH 9:1 with 5% Et<sub>3</sub>N.

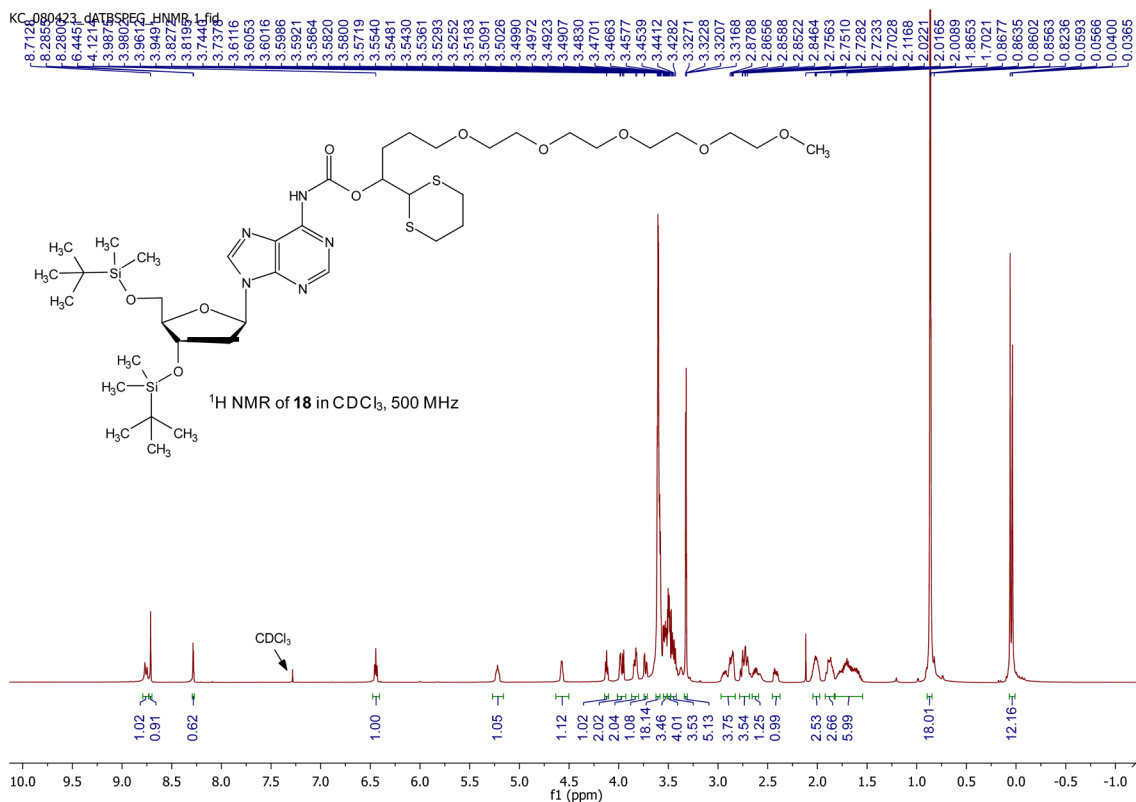



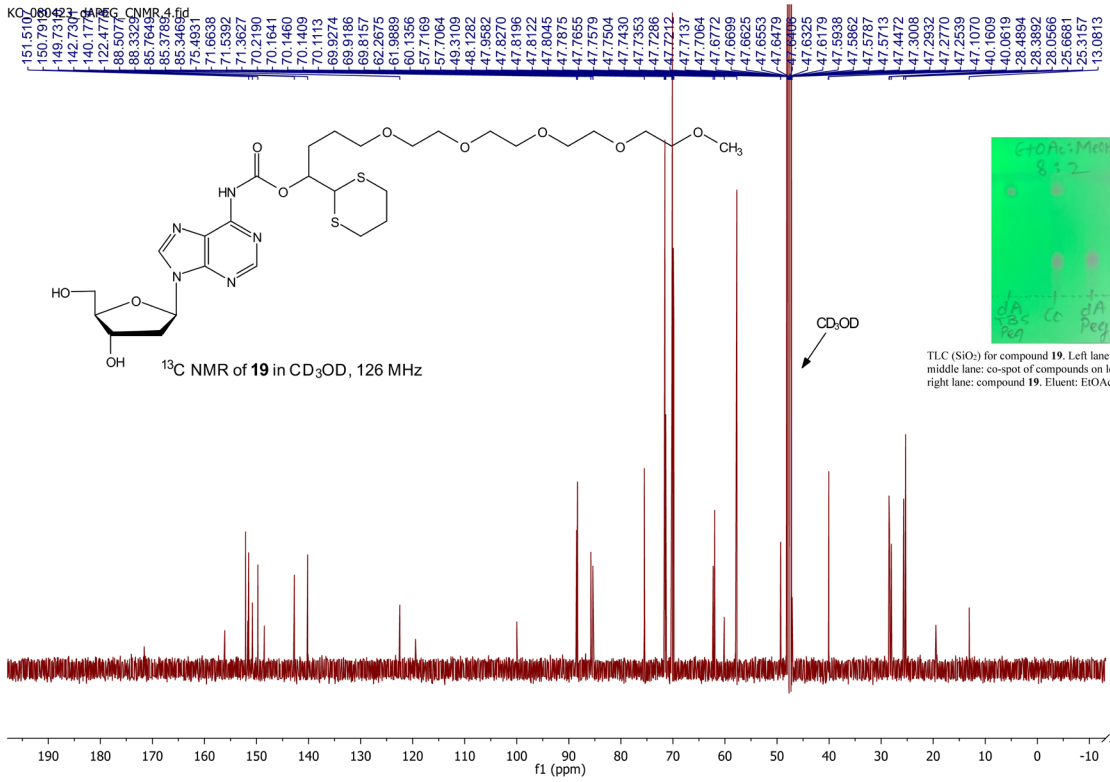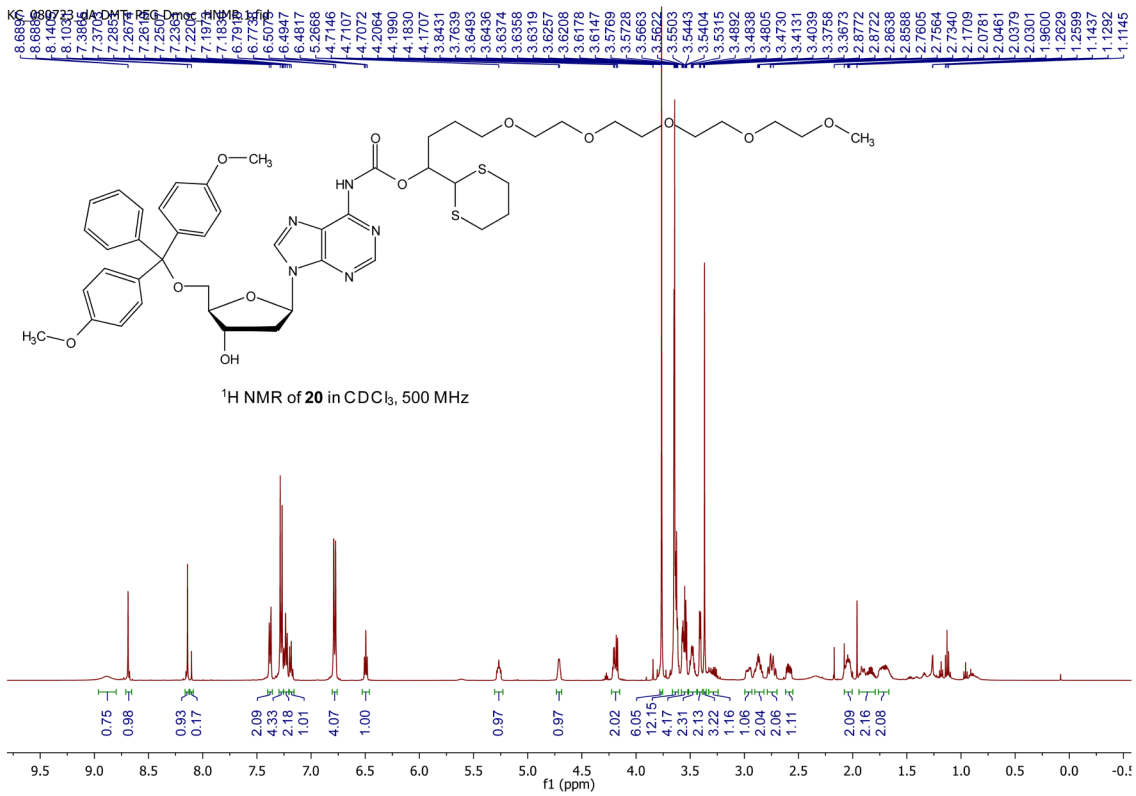

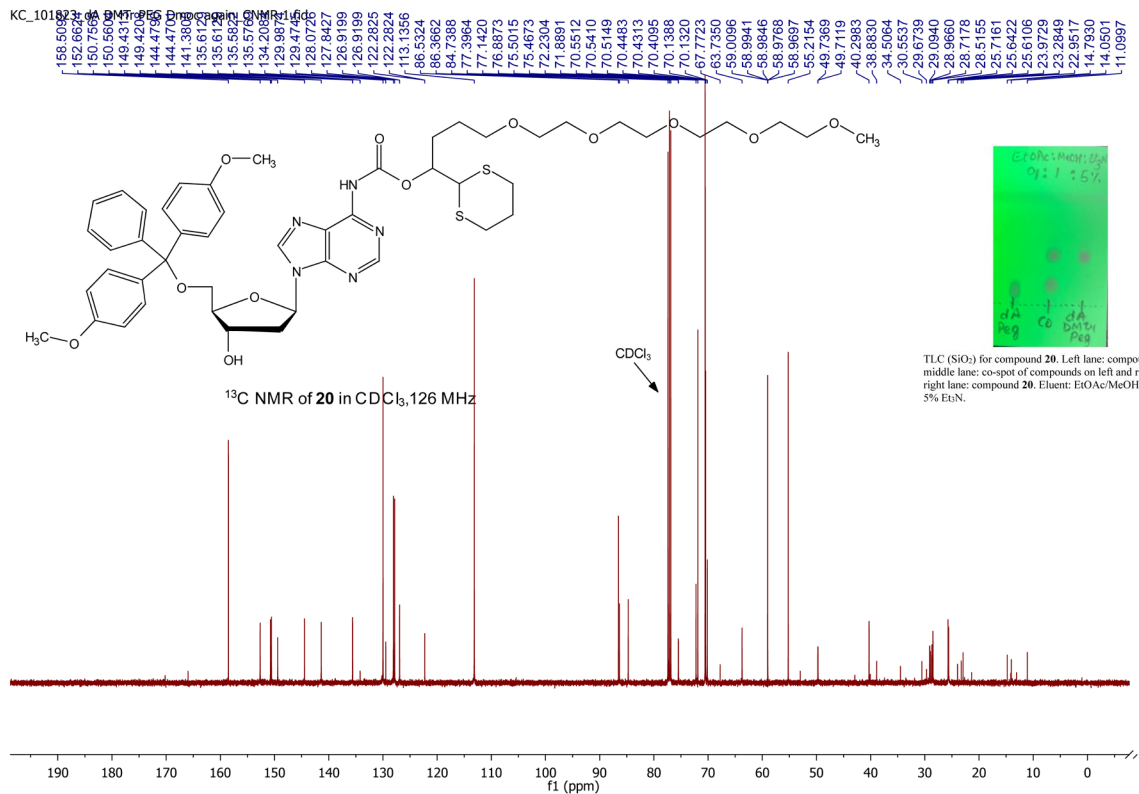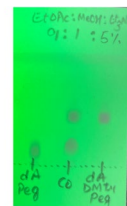

TLC (SiO<sub>2</sub>) for compound **20**. Left lane: compound **19**; middle lane: co-spot of compounds on left and right lanes; right lane: compound **20**. Eluent: EtOAc/MeOH 9:1 with 5% EtN.

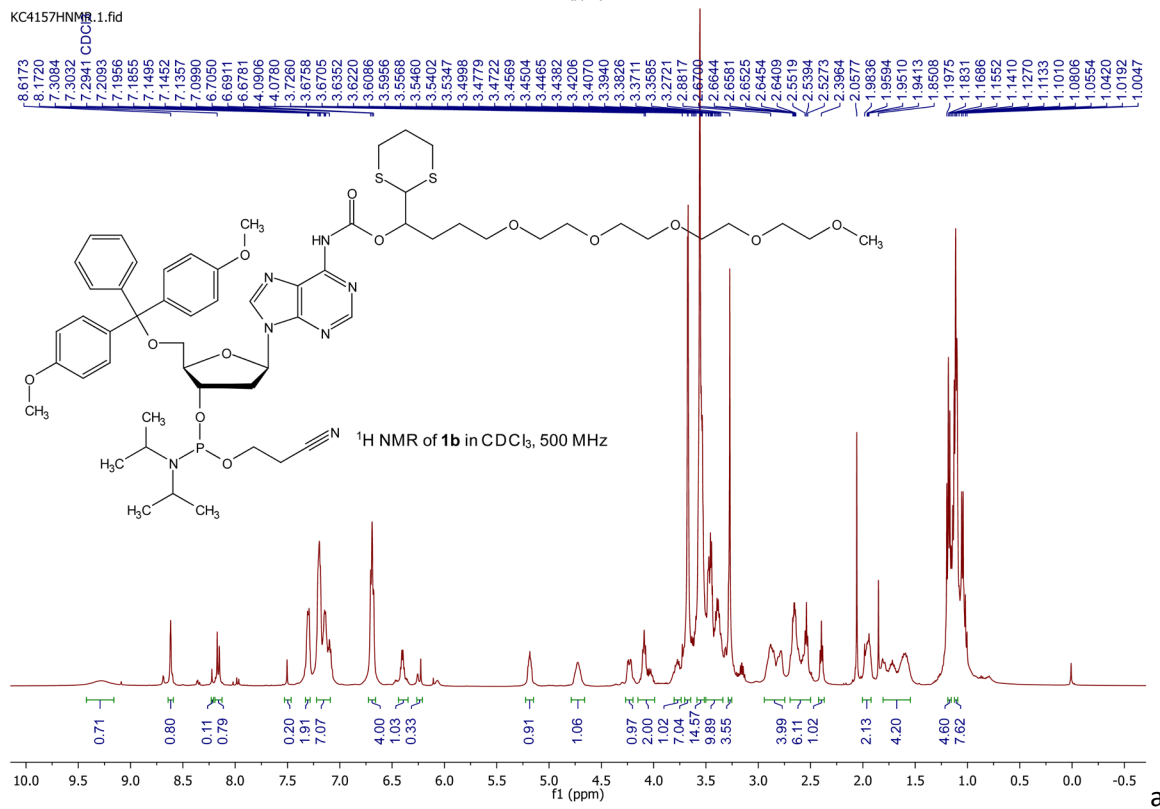



KC4157CNMRNewagain.1.fid  
Ethanol in CDOD

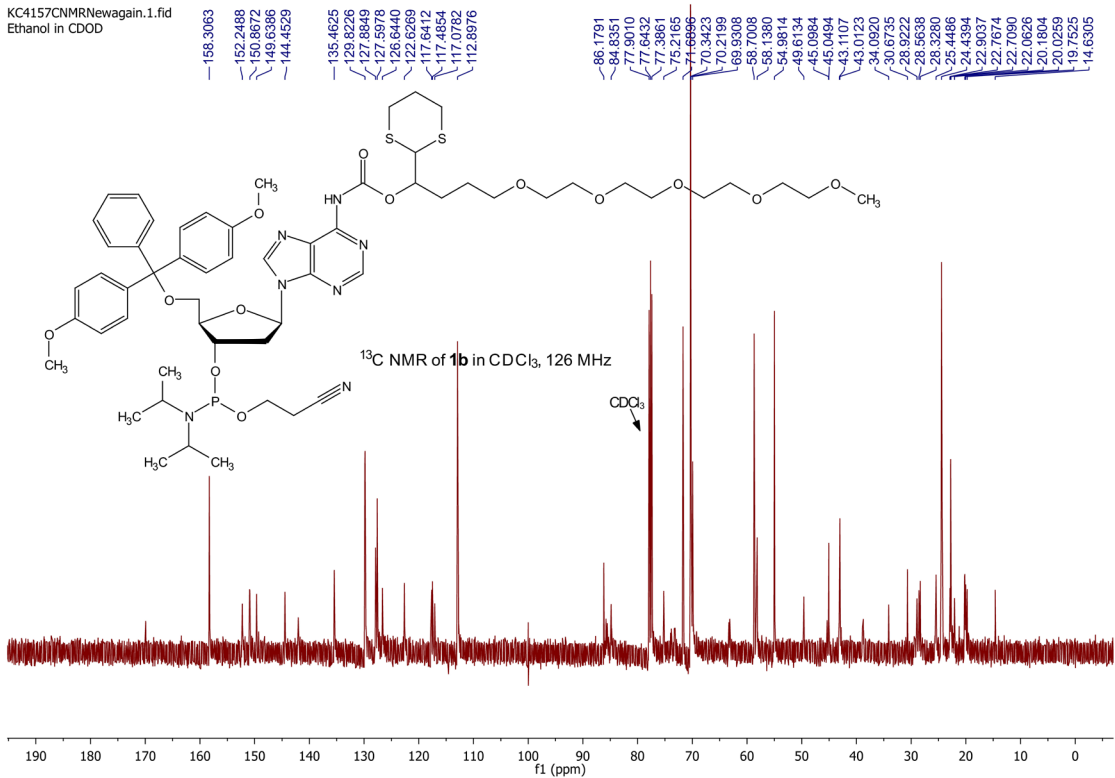

KC\_080723\_da DMTri PEG Dmoc\_PNMR New.1.fid

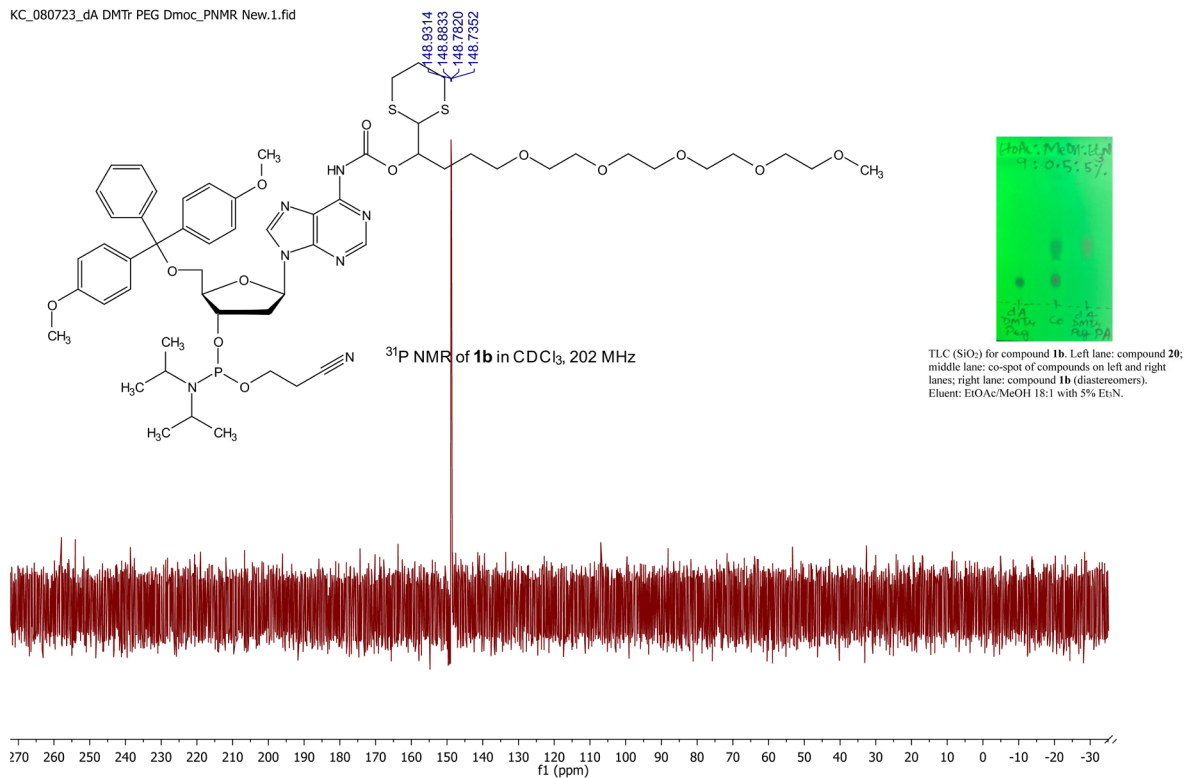

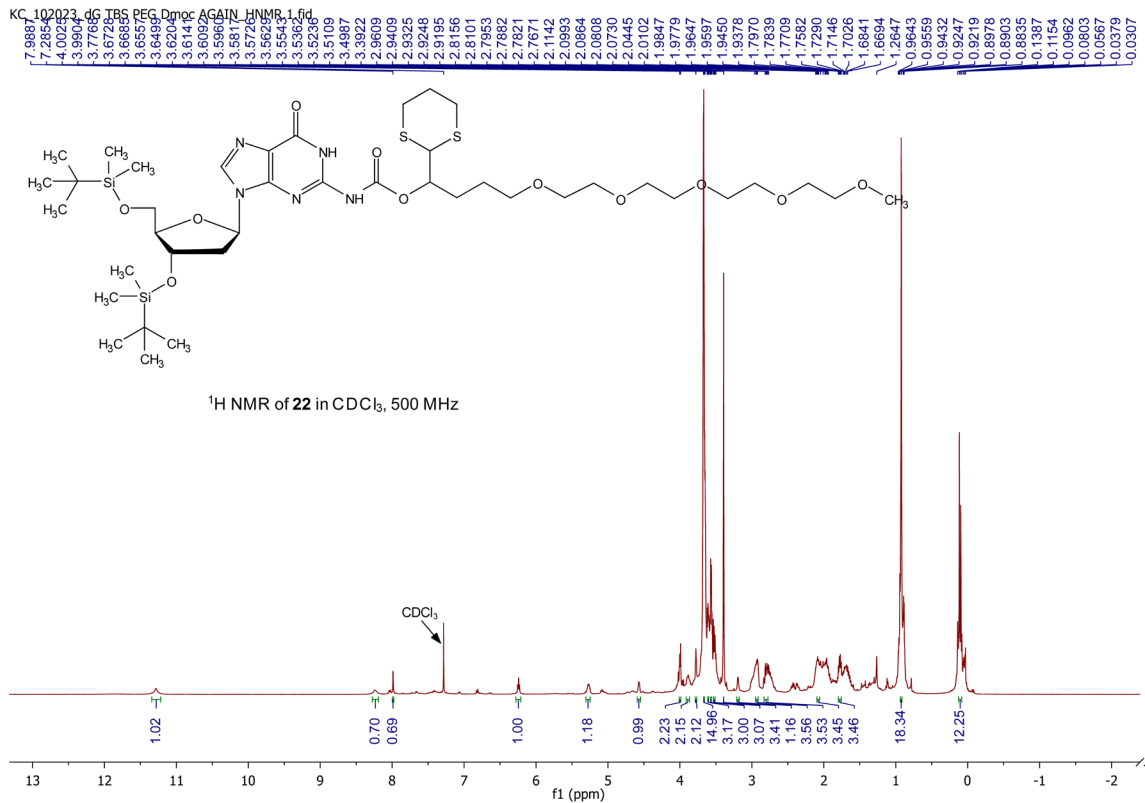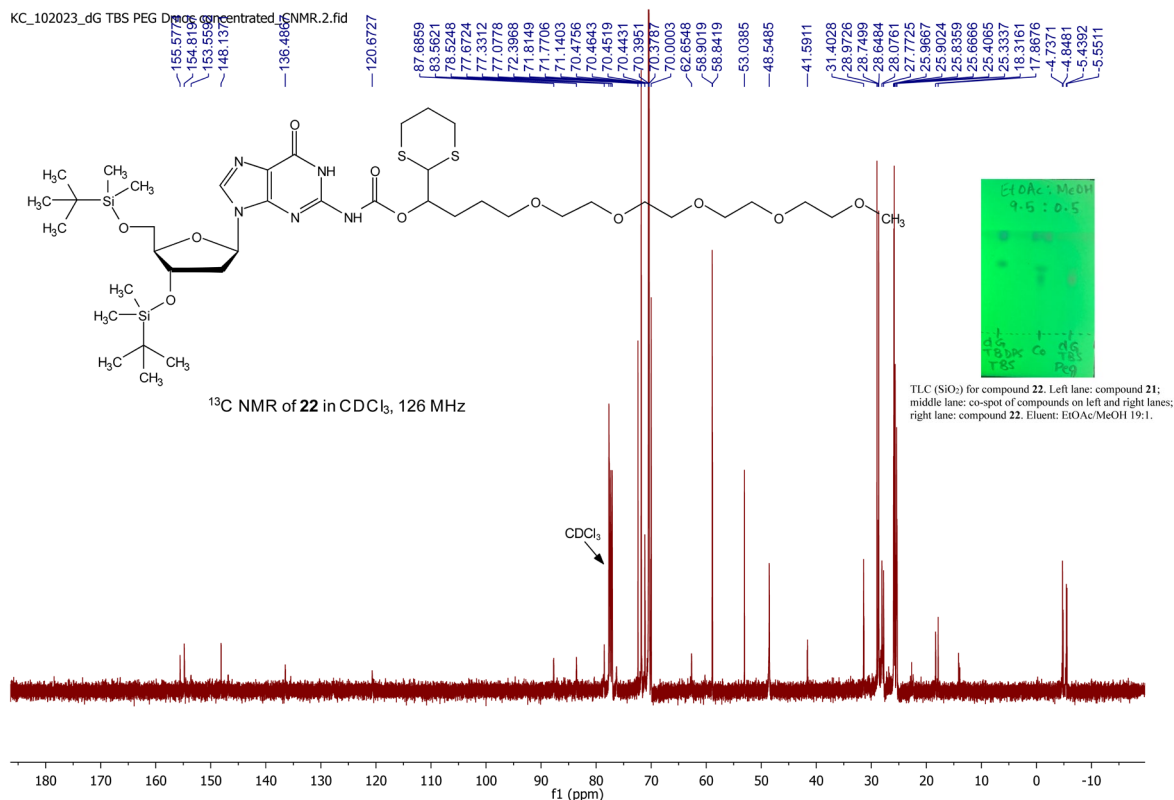

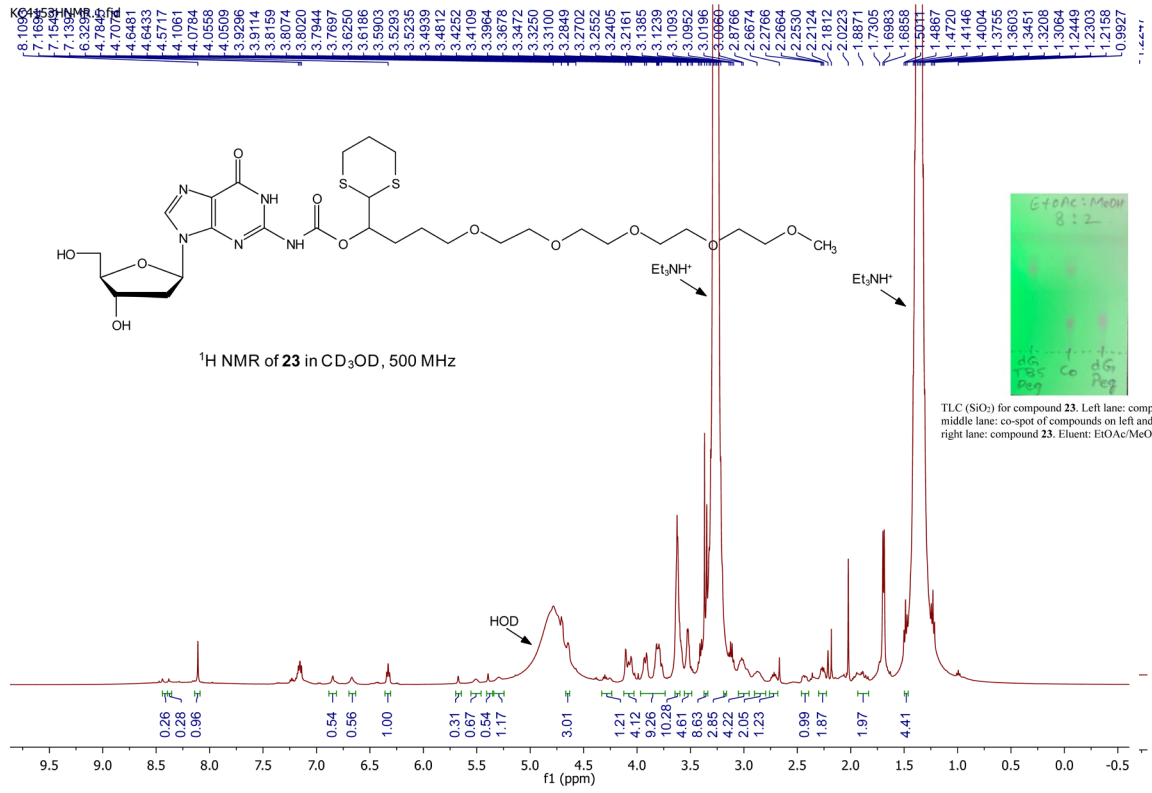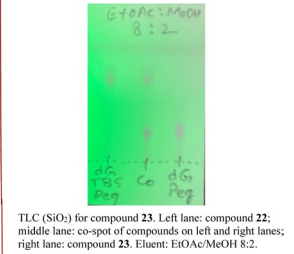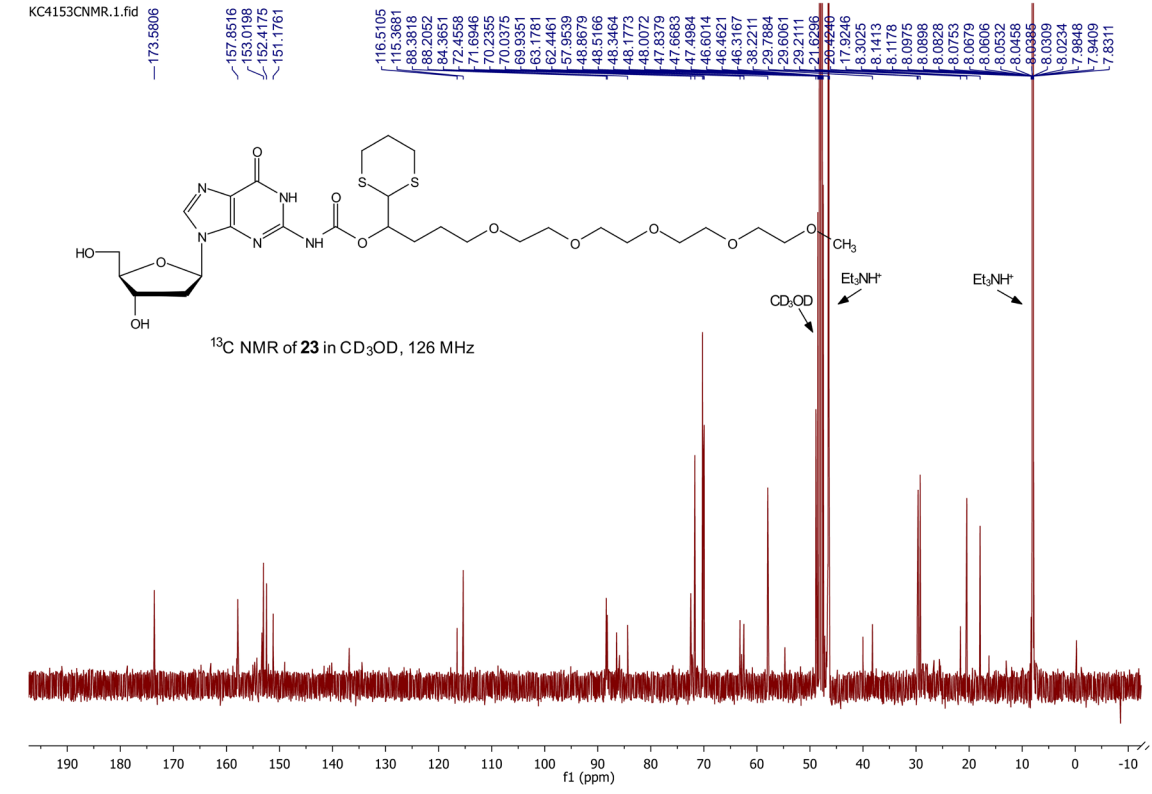

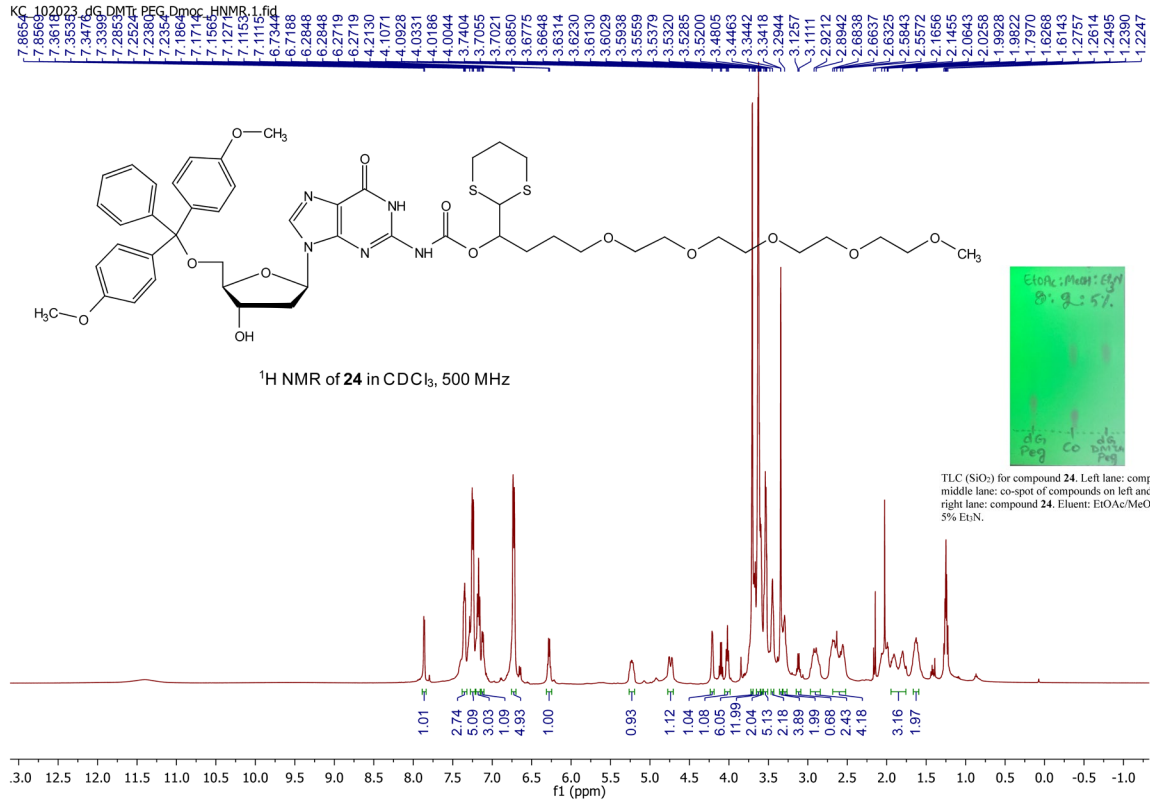

TLC (SiO<sub>2</sub>) for compound **24**. Left lane: compound **23**; middle lane: co-spot of compounds on left and right lanes; right lane: compound **24**. Eluent: EtOAc/MeOH 8:2 with 5% Et<sub>3</sub>N.

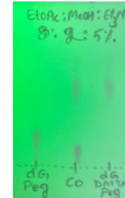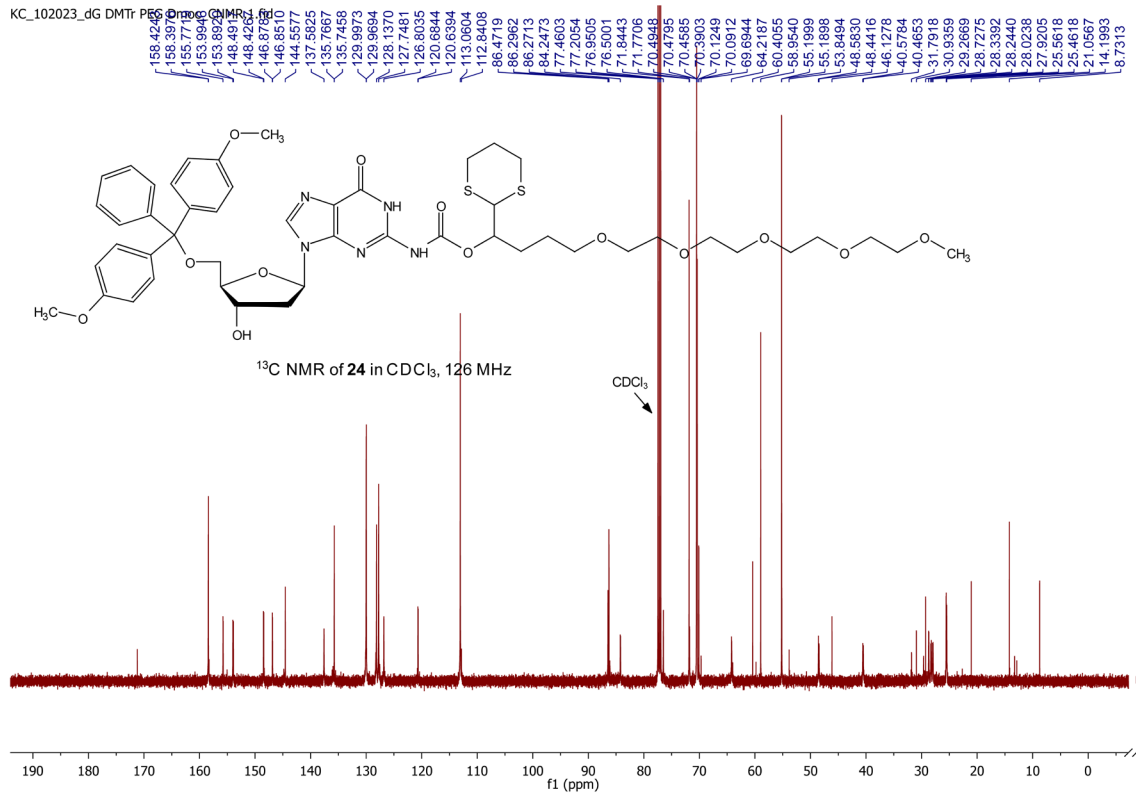

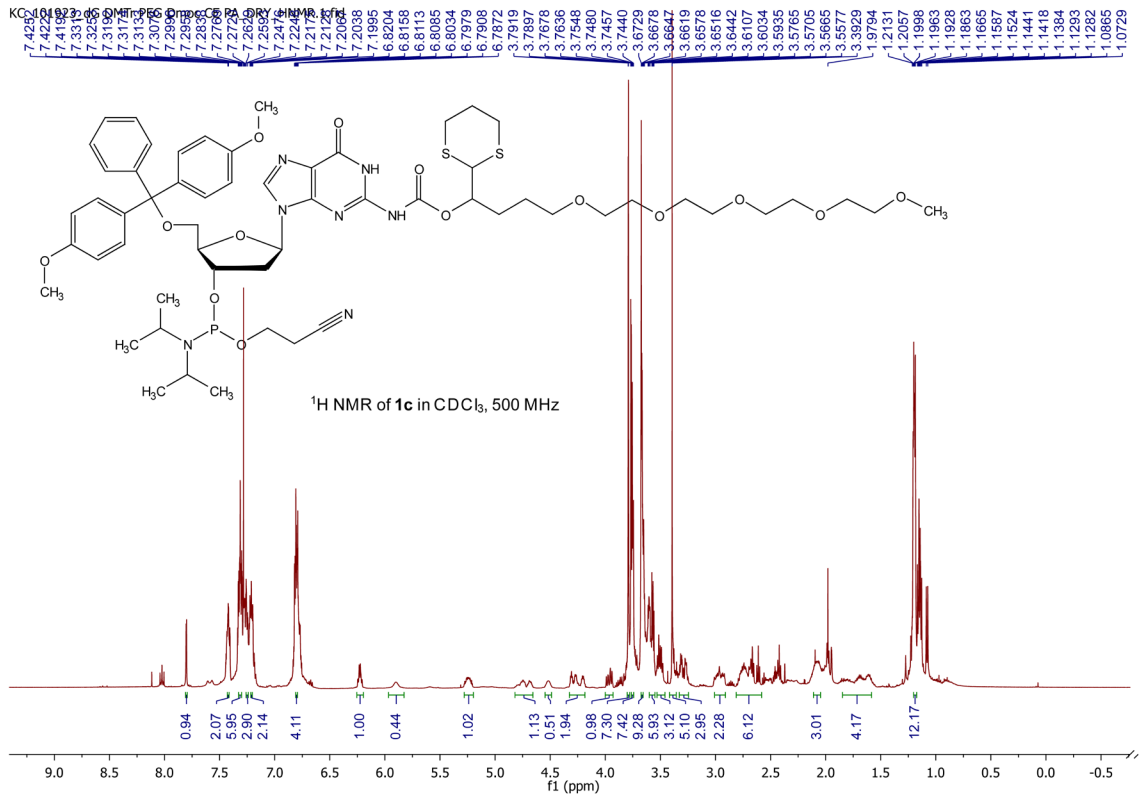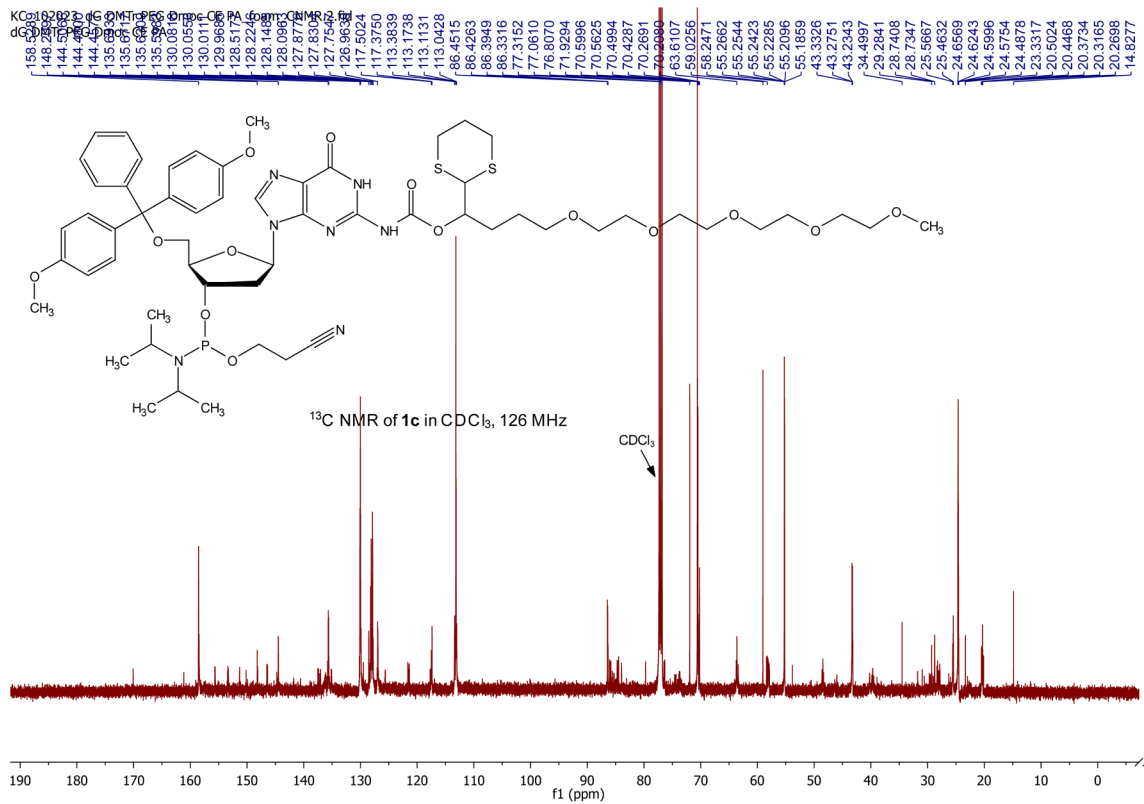

Supplement: d3ob01495a3.pdf [file d3ob01495a3.pdf]
